# Supplementary material for: New Year PlanS
Source: Oxford University Press journal article supplement (doi:10.1242/dev.174664), 2019-01-01
Supplement: dev174664supp.pdf [file dev174664supp.pdf]

## List of reviewers and co-reviewers December 2017 - November 2018

A Alwin Prem Anand, University of Tuebingen, Germany  
A. Francis Stewart, BIOTEC, Germany  
Aaron Zorn, Cincinnati Childrens Hospital, United States  
Aarunika Das, University of Pennsylvania, United States  
Abbi Hau, King's College London, United Kingdom  
Abhinava Mishra, University of California, United States  
Abigail Jackson, Lund University, Sweden  
Abigail S Tucker, King's College London, United Kingdom  
Acaimo Gonzalez-Reyes, University Pablo de Olavide Ctra, Spain  
Adam Fisher, NCSU, United States  
Adam Martin, MIT, United States  
Adam Tuttle, Oregon Health and Science University, United States  
Aditi Falnikar, columbia university, United States  
Adrian Walton Moore, RIKEN Brain Science Institute, Japan  
Adriana Migliorini, McEwen Stem Cell Institute/UHN, Canada  
Adrienne H. K. Roeder, California Institute of Technology, United States  
Adrienne Perkins, NICHD, NIH, United States  
Ahuvit David, Tel Aviv University, Israel  
Aida Rodrigo Albors, University of Dundee, United Kingdom  
Ainhoa Perez, The Rockefeller University, United States  
Aixa V. Morales, Instituto Cajal, Spain  
Akinao Nose, University of Tokyo, Japan  
Akira Nagatani, Kyoto University, Japan  
Alain Bessis, Ecole Normale Supérieure, France  
Alain Chedotal, Institut de la Vision, France  
Alasdair Wood, Australian Regenerative Medicine Institute, Australia  
Albert Courey, University of California-Berkeley, United States  
Alejandro Schinder, Instituto Leloir, Argentina  
Alejandro Vaquero, Bellvitge Biomedical Research Institute (IDIBELL), Spain  
Aleks Szymaniak, Harvard University, United States  
Ales Cvekl, Albert Einstein College of Medicine, United States  
Alessandra Sacco, Sanford Burnham, United States  
Alex F. Hajnal, University of Zurich, Switzerland  
Alex Gould, The Francis Crick Institute, United Kingdom  
Alex Kolodkin, HHMI, United States  
Alex Nechiporuk, Oregon Health and Science University, United States  
Alex Pollen, UCSF, United States  
Alexander Aulehla, EMBL Heidelberg, Germany  
Alexander M Jones, University of Cambridge, United Kingdom  
Alexander Medvinsky, Inst. for Stem Cell Research, United Kingdom  
alexander Pollen, UCSF, United States  
Alexandra Gunne-Braden, The Francis Crick Institute, United Kingdom  
Alexandra L Joyner, Sloan-Kettering Institute, United States  
Alexandre Dayer, University of Geneva, Switzerland  
Alexandre Djiane, Inserm, France  
Alexandre Kabla, University of Cambridge, United Kingdom  
Alexandria Hughes, University of Colorado Denver, United States  
Alexis Hubaud, Novartis Institute for BioMedical Research, United States  
Alfonso Martinez Arias, University of Cambridge, United Kingdom  
Ali Brivanlou, The Rockefeller University, United States  
Ali Nematbakhsh, University Of California, Riverside, United States  
Alice Neal, University of Oxford, United Kingdom  
Alicia Hidalgo, University of Birmingham, United Kingdom  
Allison Bardin, Institut Curie, France  
Alwyn Dady, University of Dundee, United Kingdom  
Alys Jarvela, University of Maryland, United States  
Amanda Swain, Institute of Cancer Research, United Kingdom  
Amander Clark, UCLA, United States

Amber Stratman, NICHD, NIH, United States  
Amel Gritli-Linde, Sahlgrenska Academy at the University of Gothenburg, Sweden  
Amin Ghabrial, Columbia University, United States  
Amit Singh, University of Dayton, United States  
Amy Bejsovec, Duke University, United States  
Amy E Merrill, University of Southern California, United States  
Amy Ralston, Michigan State University, United States  
An Zwijsen, K.U.Leuven, Belgium  
Analyne Schroeder, Sanford-Burnham Medical Res. Inst., United States  
Andia Redpath, DPAG, Oxford, United Kingdom  
Andras Simon, Karolinska Institute, Sweden  
Andre Brandli, Ludwig-Maximilians-University Munich, Germany  
André Le Bivic, IBDML, France  
Andre M Goffinet, Univ Louvain, Belgium  
Andre Van Wijnen, Mayo Clinic, United States  
Andrea Ditadi, SR-TIGET, Italy  
Andrea H Brand, University of Cambridge, United Kingdom  
Andrea Hallberg, University of Iowa Medical School, United States  
Andrea Kranz, BIOTEC, Germany  
Andrea M Gomez, University of Basel, Switzerland  
Andrea Pauli, IMP Vienna, Austria  
Andrea Streit, King's College London, United Kingdom  
Andrea Vortkamp, Abteilung fuer Entwicklungsbiologie, Germany  
Andrea Wills, University of Washington, United States  
Andreas Bergmann, University of Massachusetts Medical School, United States  
Andreas Hejnl, University of Bergen, Norway  
Andreas Hilfinger, University of Toronto, Canada  
Andreas Kispert, Medizinische Hochschule Hannover, Germany  
Andreas Sagner, The Francis Crick Institute, United Kingdom  
Andreas Zaucker, University of Warwick, United Kingdom  
Andrew Brack, Eli and Edythe Broad Center of Regeneration Medicine and Stem Cell Research, United States  
Andrew C Nelson, University of Warwick, United Kingdom  
Andrew C. White, Cornell University, United States  
Andrew D Chisholm, University of California San Diego, United States  
Andrew D Johnson, University of Nottingham, United Kingdom  
Andrew Dudley, University of Nebraska Medical Center, United States  
Andrew Duncan, University of Pittsburgh, United States  
Andrew Fleming, University of Sheffield, United Kingdom  
Andrew G Elefanty, Murdoch Childrens Research Institute, Australia  
Andrew Gillis, University of Cambridge, United Kingdom  
Andrew J. Copp, Institute of Child Health, UCL, United Kingdom  
Andrew J. W. Furley, University of Sheffield, United Kingdom  
Andrew Jarman, University of Edinburgh, United Kingdom  
Andrew K Groves, Baylor College of Medicine, United States  
Andrew McMahon, USC, United States  
Andrew Oates, Francis Crick Institute/University College London, United Kingdom  
Andrew Plygawko, Wellcome Trust/Cancer Research UK Gurdon Institute, United Kingdom  
Andrew Waskiewicz, University of Alberta, Canada  
Andrew Woolley, University Toronto, Canada  
Andy Golden, NIDDK/NIH, United States  
Andy Greenfield, MRC Harwell, United Kingdom  
Andy J Fischer, The Ohio State University, United States  
Andy Malinowski, post-doc, Helmholtz Zentrum Munchen, Germany  
Anestis Tsakiridis, University of Sheffield, United Kingdom  
Angela Christiano, Columbia University, United States  
Angela DePace, Harvard Medical School, United States  
Angela Giangrande, IGBMC, France  
Angela Nieto, Instituto de Neurociencias de Alicante, Spain  
Angeleen Fleming, University of Cambridge, United Kingdom

Angelike Stathopoulos, Caltech - Pasadena, United States  
Anirban Baral, SLU, Sweden  
Ankit Walia, University of Cambridge, United Kingdom  
Ann E. Sutherland, University of Virginia, United States  
Ann Rougvié, University of Minnesota, United States  
Anna Cha, Harvard Medical School, United States  
Anna Kicheva, IST Austria, Austria  
Anna Philpott, University of Cambridge, United Kingdom  
Anna Reichelt, University of Heidelberg, Germany  
Anna-Katerina Hadjantonakis, Sloan-Kettering Institute, United States  
Annalisa Fico, Institute of Genetics and Biophysics A Buzzati-Traverso, Italy  
Anne Grapin-Botton, DanStem, University of Copenhagen, Denmark  
Anne Pfeiffer, University of Heidelberg, Germany  
Anne Plessis, Institut Jacques Mondod UMR 7592, France  
Anne-Karina Theresia Perl, Cincinnati Children's Hospital, United States  
Anne-Kathrin Classen, Albert Ludwigs University Freiburg, Germany  
Annelie Carlsbecker, Uppsala University, Sweden  
Annick Sawala, The Francis Crick Institute, United Kingdom  
Anthony B Firulli, Riley Heart Research Center Wells Center for Pediatric Research Indiana University School of Medicine, United States  
Anthony Bishopp, University of Nottingham, United Kingdom  
Anthony Graham, King's College London, United Kingdom  
Anthony Percival-Smith, University of Western Ontario, Canada  
Antoine Peters, Friedrich Miescher Institute for Biomedical Research, Switzerland  
Anton Wutz, Institute of Molecular Health Sciences, Switzerland  
Antonello Mallamaci, SISSA, Italy  
Antonio Jacinto, CEDOC, NOVA Medical School, Portugal  
Antonio Martínez-Laborda, Universitas Miguel Hernandez, Spain  
Anwen Bullen, UCL, United Kingdom  
Arash Bashirullah, University of Wisconsin-Madison, United States  
Ariadne Hager-Theodorides, Agricultural University of Athens, Greece  
Arica Beisaw, Goethe-Universität Frankfurt, Germany  
Ariel Bazzini, The University of Kansas School of Medicine, United Kingdom  
Ariel D Chipman, Hebrew Univ of Jerusalem, Israel  
Arif Kirmizitas, University of Oxford, United Kingdom  
Arnaud Martin, The George Washington University, United States  
Arne Mould, U Oxford, United Kingdom  
Arnould Savoure, UPMC Univ Paris, France  
Arp Schnittger, University of Hamburg, Germany  
Arthur Butt, University of Portsmouth, United Kingdom  
Artyom Kopp, UC Davis, United States  
athena ypsilantin, UCSF, United States  
Atsuko Yamazaki, Tohoku University, Japan  
Atsushi Asakura, University Minnesota, United States  
Audrey Kindfather, University of Western Ontario/, Canada  
aurelie quillien, Université Paul Sabatier Toulouse3/ CBD, France  
Aurelio Teleman, DKFZ, Germany  
Austin Smith, University of Cambridge, United Kingdom  
Avinash Waghray, Harvard University, United States  
Azim Surani, Wellcome Trust/Cancer Research UK Gurdon Institute, United Kingdom  
Azusa Inoue, RIKEN-IMS, Japan  
Bandarigoda Nipunika Somatilaka, UT Southwestern Medical Center, United States  
Baptiste Coxam, Max-Delbrueck-Center for Molecular Medicine in the Helmholtz Association (MDC), Germany  
Barbara Treutlein, Max Planck Institute for Evolutionary Anthropology, Germany  
Barry Thompson, London Research Institute, United Kingdom  
Bassem Hassan, ICM, France  
Battala Vijaya Lakshmi Vadde, California Institute of Technology, United States  
Beatriz Estrada, Universidad Pablo de Olavide, Spain  
Ben Hogan, University of Queensland, Australia

Ben Humphreys, Washington University School of Medicine in St Louis, United States  
Ben Hung Ping Shih, City of Hope, United States  
ben trevaskis, CSIRO Agriculture, Australia  
B n dicte Desvoves, Centro de Biologia Molecular Severo Ochoa, Spain  
B n dicte Desvoves, PhD, Centro de Biologia Molecular Severo Ochoa, Spain  
Benedicte Durand, CGPhiMC UMR5534 CNRS, France  
Benedicte Sanson, University of Cambridge, United Kingdom  
Benjamin A Eaton, University of Texas Health Science Center at San Antonio, United States  
Benjamin Alman, The Hospital for Sick Children, Canada  
Benjamin Boumard, Institut Curie, France  
Benjamin Cyge, postdoctoral fellow in the lab, Sloan-Kettering Institute, United States  
Benjamin J Steventon, University of Cambridge, United Kingdom  
Benjamin L. Allen, University of Michigan, United States  
Benjamin Lin, NYU School of Medicine and HHMI, United States  
Benoit Bruneau, Gladstone Institute of Cardiovascular Disease, United States  
Benoit Menand, Institute of biosciences and biotechnologies of Aix-Marseille, France  
Ben-Zion Shilo, Weizmann Institute, Israel  
Berenika Plusa, University of Manchester, United Kingdom  
Bernard Peers, Universit  de Li ge, Belgium  
Bernard Zalc, CRICM, France  
Bernd Fritzscht, University of Iowa, United States  
Bernhard G Herrmann, Max-Planck-Institute for Molecular Genetics, Germany  
Bert Blaauw, University of Padua, Italy  
Bert De Rybel, VIB/Ghent University, Belgium  
Berta Alsina, Universitat Pompeu Fabra, Spain  
Berthold Gottgens, University of Cambridge, United Kingdom  
Bertrand Benazeraf, CNRS, France  
Bertrand PY PAIN, U846 Inserm, France  
Beth Stevens, Harvard Medical School, United States  
Betsy Shock, Northwestern University, United States  
Bin Chen, University of California, Santa Cruz, United States  
Bin Yu, University of Nebraska-Lincoln, Lincoln, Nebraska, United States of America, United States  
Bing Ye, University of Michigan, United States  
Blanche Capel, Duke University Medical Center, United States  
Bob Goldstein, University of North Carolina at Chapel Hill, United States  
Bob Reed, Cornell University, United States  
Brad Davidson, Swarthmore College, United States  
Bradley Goldstein, University of Miami Miller School of Medicine, United States  
Brandon Wainwright, The University of Queensland, Australia  
Brant Weinstein, NICHD, NIH, United States  
Brenda J Rongish, University of Kansas Medical Center, United States  
Bria Macklin, Johns Hopkins University, United States  
Brian Ciruna, The Hospital for Sick Children, Canada  
Brian Coon, Yale University School of Medicine, United States  
Brian Cox, Toronto, United States  
Brian D. Harfe, University of Florida, United States  
Brian Hendrich, University of Cambridge, United Kingdom  
Brian Jorgensen, University of Nevada School of Medicine, United States  
Brian L Black, University of California, San Francisco, United States  
Brian Link, Medical College of Wisconsin, United States  
Brian Marc Stramer, King's College London, United Kingdom  
Brian Mitchell, Northwestern University Feinberg School of Medicine, United States  
Brian R Calvi, Indiana University, United States  
Brian Rabe, Harvard Medical School, United States  
Brian Raftrey, Stanford University, United States  
Brigid Hogan, Duke University Medical Center, United States  
Brigitte LaForrest, The University of Chicago, United States  
Brikha Shrestha, Harvard Medical School, United States  
Britta Eickholt, Charit  - Universit tsmedizin Berlin, Germany  
Brittany Collins, University of Utah, United States

Brock Grill, The Scripps Research Institute, Florida, United States  
Brooke McCartney, Carnegie Mellon University, United States  
Bruce Appel, University of Colorado Denver, United States  
Bruce Blumberg, University of California, Irvine, United States  
Bruce Bowerman, University of Oregon, United States  
Bruce Edgar, German Cancer Research Center (DKFZ)-, Germany  
Bruce Riley, Texas A&M University, United States  
Bruce W Draper, University of California, Davis, United States  
Bruno Lemaître, EPFL, Switzerland  
Bruno Müller, IPK, Gatersleben, Germany, Germany  
Bruno Silva-Santos, Instituto de Medicina Molecular (IMM), Portugal  
Budhaditya Banerjee, Brigham and Women's Hospital, United States  
Buzz Baum, MRC Laboratory for Molecular Cell Biology &, United Kingdom  
C Yan Cheng, Population Council, United States  
C.M. Chuong, University of Southern California, United States  
Caitlin Devitt, PhD student, UT Austin, United States  
Camilla Forsberg, University of California Santa Cruz, United States  
Camille Charoy, UCL Institute of Ophthalmology, United Kingdom  
Caren Norden, Max Planck Institute, Germany  
Carl Thummel, University of Utah, United States  
Carla Taveggia, San Raffaele Scientific Institute, Italy  
Carles recassens post doc, National Institute Medical Research, United Kingdom  
Carles Recassens, National Institute Medical Research, United Kingdom  
Carlos Moraes, University of Miami, United States  
Carl-Philipp Heisenberg, Institute of Science and Technology Austria, Austria  
Carlton Bates, University of Pittsburgh, United States  
carmen andrikou, Sars centre for marine molecular biology, Norway  
Carmen Birchmeier, Max-Delbrück-Centrum für Molekulare Medizin, Germany  
Carmen Ruiz de Almodovar, University of Heidelberg, Germany  
Carol Mason, Columbia University, United States  
Carole La Bonne, Northwestern University, United States  
Caroline Erter Burns, Massachusetts General Hospital, United States  
Caroline Hill, The Francis Crick Institute, United Kingdom  
Caroline W Beck, University of Otago, New Zealand  
Catherina G. Becker, University of Edinburgh, United Kingdom  
Catherine O'Brien, University Health Network, Canada  
Catherine Porcher, University of Oxford, United Kingdom  
Catherine Rabouille, Hubrecht Institute of the KNAW, Netherlands  
Cathrin Brisken, Swiss Institute for Experimental Cancer Research, Switzerland  
Cathy Lee L Mendelsohn, Columbia University, United States  
Cathy Savage-Dunn, Queens College, CUNY, United States  
Cecilia L Winata, International Institute of Molecular and Cell Biology in Warsaw, Poland  
Cedric Blanpain, Université Libre de Bruxelles (ULB), Belgium  
Cedric Maurange, Institute of Developmental Biology of Marseille, France  
Celeste Berg, University of Washington, United States  
Celia E Shiau, University of North Carolina at Chapel Hill, United States  
Chad A Cowan, Harvard University, United States  
Chaitanya Dingare, University of Frankfurt, Germany  
Channabasavaiah B Gurusurthy, Munroe-Meyer Institute, United States  
Charles A. Ettensohn, Carnegie Mellon University, United States  
Charles F Shuler, University of British Columbia, Canada  
Charles Melnyk, Swedish University of Agricultural Sciences, Sweden  
Chenbei Chang, University of Alabama at Birmingham, United States  
Chen-Ming Fan, Carnegie Institution of Washington, United States  
Cheryle Seguin, University of Western Ontario, Canada  
Chiara Sinigaglia, Institut De Genomique Fonctionnelle De Lyon, France  
Chichung D. Lie, Institute of Developmental Genetics, Germany  
Chih-Jen Lin, The University of Edinburgh, United Kingdom  
Chi-Hon Lee, Institute of Cellular and Organismic Biology, Academia Sinica, Taiwan  
Chin Chiang, Vanderbilt University, United States



Chloe Shard, Institut Pasteur, France  
Chris Doe, Univ Oregon, United States  
Chris Sturgeon, Washington University, United States  
Chrissa Kioussi, Oregon State University, United States  
Christen Kerry Mirth, Instituto Gulbenkian de Ciência, Portugal  
Christiaan van der Schoot, Norwegian University of Life Sciences, Norway  
Christian Boekel, Philipps-University Marburg, Germany  
Christian Dahmann, Technische Universität Dresden, Germany  
Christian F Lehner, University of Zurich, Switzerland  
Christian Frezza, Hutchison/MRC Research Centre, United Kingdom  
Christian Hardtke, University of Lausanne, Switzerland  
Christian Klambt, Universität Munster, Germany  
Christian Pohl, Goethe University, Germany  
Christiana Ruhrberg, UCL Institute of Ophthalmology, United Kingdom  
Christina Kyrousi, Max Planck Institute of Psychiatry, Germany  
Christine E. Holt, University of Cambridge, United Kingdom  
Christine Faulkner, John Innes Institute, United Kingdom  
Christine Foyer, University of Leeds, United Kingdom  
Christine Hartmann, Institut für Experimentelle Muskel-skeletalforschung (IEMM), Germany  
Christine Metin, INSERM, France  
Christine Watson, Univ Cambridge, United Kingdom  
Christof Niehrs, IMB Institute of Molecular Biology gGmbH, Germany  
Christoph Ringli, University of Zurich, Switzerland  
Christoph Viebahn, Göttingen University, Germany  
Christoph Winkler, National University of Singapore, Singapore  
Christophe E PIERREUX, de Duve Institute, Belgium  
Christophe Marcelle, Monash University, Australia  
Christopher B Geyer, East Carolina University, United States  
Christopher De Jonge, University of Minnesota, United States  
Christopher Deppmann, University of Virginia, United States  
Christopher L Antos, Center for Regenerative Therapies Dresden/TU Dresden, Germany  
Christopher L Sansam, Oklahoma Medical Research Foundation, United States  
Christopher Rookyard, MRC Centre for Developmental Neurobiology, United Kingdom  
Christopher V.E. Wright, Vanderbilt University, United States  
Christopher Yau, University of Birmingham, United Kingdom  
Christos Delidakis, Foundation for Research and Technology - Hellas (FORTH), Greece  
Christos Samakovlis, The Wenner-Gren Institute, Sweden  
Chrysa Kapeni, Cambridge Stem Cell Institute, United Kingdom  
Chun Liu, Stanford University School of Medicine, United States  
Chun-Wei Feng, University of Queensland, Australia  
Ciro Salino, Helmholtz Zentrum München, Germany  
Claire A Higgins, Imperial College of London, United Kingdom  
Claire Bromley, MRC Centre for Developmental Neurobiology, United Kingdom  
Claire Simon, Sloan-Kettering Institute, United States  
claire wyart, Institut du cerveau et de la moelle épinière, ICM, United Kingdom  
Claude Desplan, New York University, United States  
Claudio D Stern, University College London, United Kingdom  
Claudio R Alonso, University of Sussex, United Kingdom  
Claudius Frank Kratochwil, University of Konstanz, Germany  
Cliff Tabin, Harvard Medical School, United States  
Clint Ko, MIT, United States  
Clinton Whipple, Brigham Young University, United States  
Clive Wilson, University of Oxford, United Kingdom  
Colette Dehay, INSERM U846, France  
Colin Crist, McGill University, Canada  
Colin Jamora, Institute for Stem Cell Biology and Regenerative Medicine, India  
Connie Cepko, Harvard Medical School, United States  
Constance Vagne, IGBMC, France  
Cora Bergantino, Columbia University, United States  
Corinne Houart, MRC, United Kingdom

Cornelia Schwayer, Institute of Science and Technology Austria, Austria  
Cornelis J Weijer, University of Dundee, United Kingdom  
Craig Crews, Yale University, United States  
Craig Hunter, Harvard University, United States  
Craig Simmons, University of Toronto, Canada  
Craig Smibert, University of Toronto, Canada  
Craig T Miller, UC-Berkeley, United States  
Cris Kuhlemeier, University of Berne, Switzerland  
Crisanto Gutierrez, Centro de Biología Molecular Severo Ochoa, Spain  
Cristel C CARLES, Université Grenoble-Alpes, France  
Cristina Ferrandiz, Instituto de Biología Molecular y Celular de Plantas (IBMCP), Spain  
Cristina Pujades, Universitat Pompeu Fabra, Spain  
Cynthia Bradham, Boston University, United States  
Cynthia L Andoniadou, King's College London, United Kingdom  
D Joseph Jerry, University of Massachusetts-Amherst, United States  
Dagmar Iber, ETH Zürich, Switzerland  
Daichi Kawaguchi, University of Tokyo, Japan  
Dale Frank, Technion - Israel Institute of Technology, Israel  
Dali Ma, Institut de Genomique Fonctionnelle de Lyon, France  
Damon Page, The Scripps Research Institute, United States  
Dan Weeks, University of Iowa, United States  
Dana Kablawi, The Hospital for Sick Children, Canada  
Daniel Berry, Cornell University, United States  
Daniel Constam, Ecole Polytechnique Federale de Lausanne, Switzerland  
Daniel E Wagner, Harvard Medical School, United States  
Daniel Garry, University of Minnesota, United States  
Daniel Hesselton, Garvan Institute of Medical Research, Australia  
Daniel Holoch, Institute Curie, France  
Daniel Kalderon, Columbia University, United States  
Daniel Lysko, Stanford University, United States  
Daniel Oropeza, University of Geneva Faculty of Medicine, Switzerland  
Daniel Rios, Universität zu Köln, Germany  
Daniel S Wagner, Rice University, United States  
Daniel St Johnston, Wellcome Trust/Cancer Research UK Gurdon Institute, United Kingdom  
Daniel T Grimes, Princeton University, United States  
Daniela Drummond-Barbosa, Johns Hopkins University, United States  
Danielle Jorgens, University of California, Berkeley, United States  
Danielle Kopke, Vanderbilt University, United States  
Danny Chan, Faculty of Medicine Building, Hong Kong  
Darren Gilmour, University of Zurich, Switzerland  
Dave Hansen, University of Calgary, Canada  
David Asante, MRC Mammalian Genetics Unit, United Kingdom  
David Booth, University of California, Berkeley, United States  
David E. Clouthier, University of Colorado Denver, United States  
David Eisenmann, University of Maryland Baltimore County, United States  
David Flores-Benitez, Max Planck Institute, Germany  
David Frank, Children's Hospital Philadelphia, United States  
David Gonzalez, Yale Medical School, United States  
David Greenstein, University of Minnesota, United States  
David Guertin, UMass Medical School, United States  
David H Hall, Albert Einstein College of Medicine, United States  
David Hipfner, IRCM, Canada  
David J. Price, The University of Edinburgh, United Kingdom  
David Jukam, Stanford University, United States  
David Keays, Institute for Molecular Pathology, Austria  
David Kimelman, Univ of Washington Sch of Med, United States  
David Lyons, University of Edinburgh, United Kingdom  
David M Ornitz, Washington University Sch. of Med., United States  
David M Virshup, Duke-NUS Graduate Medical School, Singapore  
David M. Owens, Columbia University, United States

David McClay, Duke University, United States  
David Miller, Vanderbilt University Medical Center, United States  
David Page, Whitehead institute, United States  
David Parkinson, University of Plymouth, United Kingdom  
David R Smyth, Monash University, Australia  
David Rowitch, UCSF Children's Hospital, United States  
David S Park, NYU School of Medicine, United States  
David Solecki, St. Jude Children's Research Hospital, United States  
David Sprinzak, Tel Aviv University, Israel  
David Strutt, University of Sheffield, United Kingdom  
David Traver, University of California, San Diego, United States  
David W Raible, University of Washington, United States  
David Zarkower, University of Minnesota, United States  
Davor Solter, Max-Planck Institute, United States  
Dawei Sun, University of Cambridge, United Kingdom  
Debarati Basu, postdoctoral fellow, Washington University in Saint Louis, United States  
Deborah L. Chapman, University of Pittsburgh, United States  
Deborah Yelon, University of California, San Diego, United States  
Debra L Silver, Duke University Medical Center, United States  
Deepanwita Pal, Shriners Hospital for Children, Portland, United States  
Delphine Duprez, CNRS, France  
Deneen M. Wellik, University of Michigan Medical Center, United States  
Denise Montell, University of California, United States  
Deniz Abdusselamoglu, IMBA, Austria  
Dennis Clegg, University of California, Santa Barbara, United States  
Detlef Weigel, Max Planck Inst, Germany  
Diana Chu, San Francisco State University, United States  
Diana Toivola, Abo Akademi University, Finland  
Diane Bassham, Iowa State University, United States  
Diane Shakes, College of William and Mary, United States  
Didier Y.R Stainier, Max Planck Institute, Germany  
Dietmar Schmucker, VIB, Belgium  
Diogo S. Castro, Instituto Gulbenkian de Ciência, Portugal  
Dirk G. de Rooij, Utrecht University, Netherlands  
Ditsa Levanon, The Weizmann Institute of Science, Israel  
Dolf Weijers, Wageningen University, Netherlands  
Domingos Henrique, Instituto de Medicina Molecular, Portugal  
Dominic P Norris, MRC Mammalian Genetics Unit, United Kingdom  
Dominique R Alfandari, University of Massachusetts Amherst, United States  
Donal O'Carroll, The University of Edinburgh, United Kingdom  
Donna M Fekete, Purdue University, United States  
Doris Wu, National Institute on Deafness, United States  
Dorothea Schulte, Goethe University Medical School, Germany  
Doug Melton, Harvard University, United States  
Douglas Epstein, University of Pennsylvania, United States  
Drew Hagan, Washington University Sch. of Med., United States  
Dritan Agalliu, Columbia University Medical Center, United States  
Duanqing Pei, Chinese Academy of Sciences, China  
Dustin L. Updike, The Mount Desert Island Biological Laboratory, United States  
Dyche Mullins, University of California, United States  
E. Jane Hubbard, Skirball Institute, United States  
Ebony Flowers, University of Texas Southwestern Medical Center, United States  
Eckhard Lammert, Heinrich-Heine-University, Germany  
Ed Morrissey, University of Pennsylvania, United States  
Edith Heard, Institut Curie, France  
Edouard Hannezo, IST Austria, Austria  
Eduardo Moreno, University of Bern, Switzerland  
Eduardo Pulgar, Universidad de Chile, Chile  
Edward Pym, Harvard Medical School, United States  
Edwin Munro, University of Chicago, United States



Edwin Rosado, Harvard University, United States  
eiki koyama, thomas jefferson university, United States  
Elaine Emmerson, University of Edinburgh, United Kingdom  
Elazar Zelzer, Weizmann Institute of Science, Israel  
Eldad Tzahor, The Weizmann Institute of Science, Israel  
Eleanor M. Maine, Syracuse University, United States  
Eli Knust, Max Planck Institute, Germany  
Eliana Mor, VIB/Ghent University, Belgium  
Elias Elinati, MRC NIMR, United Kingdom  
Elise Cau, UMR5547 CNRS/UPS, France  
Elizabeth AV Jones, KU Leuven, Belgium  
Elizabeth Gavis, Princeton University, United States  
Elizabeth Haswell, Washington University in Saint Louis, United States  
Elizabeth Miller, Harvard Medical School and Brigham & Women's Hospital, United States  
Elizabeth Schultz, University of Lethbridge, Canada  
Elke A Ober, University of Copenhagen, Denmark  
Elliot Perens, University of California San Diego, United States  
Elly M Hol, Netherlands Institute for Neurosciences, Netherlands  
Elly Tanaka, Research Institute for Molecular Pathology, Austria  
Eloina Corradi, University of Trento, Italy  
Emile Wilkie, Childrens Medical Research Institute, Australia  
Emma L Rawlins, University of Cambridge, United Kingdom  
Enrico Scarpella, University of Alberta, Canada  
Enrique Amaya, University of Manchester, United Kingdom  
Enrique Martin-Blanco, Instituto de Biología Molecular de Barcelona, CSIC, Spain  
Enzo R Porrello, Murdoch Children's Research Institute, Australia  
Erbil Abaci, Columbia University, United States  
Eric Brunskill, Cincinnati Children's hospital, United States  
Eric J Huang, University of California San Francisco, United States  
Eric Jaffe, University of Colorado Boulder, United States  
Eric Olson, Univ of Texas Southwestern Med.Cntr., United States  
Eric Rottinger, University Cote d'Azur / CNRS / INSERM, France  
Eric S Haag, University of Maryland, College Park, United States  
Eric Thomas, University of Washington, United States  
Eric Van Otterloo, University of Colorado, United States  
Erik Clark, University of Cambridge, United Kingdom  
Erika Bach, New York University School of Medicine, United States  
Erika Geisbrecht, Kansas State University, United States  
Erika Matunis, Johns Hopkins University School of Medicine, United States  
Erin Irish, University of Iowa, United States  
Erin Schuman, Max Planck Institute, Germany  
Ernesto Sanchez-Herrero, Centro de Biología Molecular Severo Ochoa, Spain  
Ertugrul Ozbudak, Cincinnati Children's Hospital Medical Center, United States  
Esteban Mazzoni, New York University, United States  
Esther Joeng Yoon Kim, EMBL, Germany  
Ethan Lee, Vanderbilt University, United States  
Evan Rosen, Beth Israel Deaconess Medical Center, United States  
Evan S. Deneris, Case Western Reserve University, United States  
Evgeniy Ozonov, Friedrich Miescher Institute for Biomedical Research, Switzerland  
F Rob Jackson, Tufts University, United States  
Fabien Le Grand, UPMC, France  
Fabio Fornara, University of Milan, Italy  
Fabrice Besnard, Lyon, France  
Fang Lin, University of Iowa, United States  
Fanny Mann, Institut de Biologie du Développement de Marseille, France  
Farzad Esni, University of Pittsburgh, United States  
Fed Zhao, NIEHS, United States  
Federico Calegari, CRTD, Germany  
Federico Tessadori, Hubrecht Institute, Netherlands  
Feeling Chen, UCSF, United States

Fei Gao, Institute of Zoology, Chinese Academy of Sciences, China  
Fengwei Yu, Temasek Life Sciences Laboratory, Singapore  
Ferdinand von Meyenn, The Babraham Institute, United Kingdom  
Fernando Aguado, Barcelona, Spain  
Fernando Casares, CABD (Centro Andaluz de Biología del Desarrollo), CSIC-University Pablo de Olavide, Spain  
Fernando García-Moreno, Achucarro Basque Center for Neuroscience, Spain  
Fernando Giraldez, UNIVERSITAT POMPEU FABRA, Spain  
Fernando H Biase, Auburn University, United States  
Filipe Pinto-Teixeira, New York University, United States  
Filippo Del Bene, institut Curie, France  
Filippo M Rijli, Friedrich Miescher Institute (FMI), Switzerland  
Finn Hawkins, Boston University, United States  
Fiona Francis, INSTITUT DU FER À MOULIN, France  
Florence L. Marlow, Icahn School of Medicine at Mount Sinai, United States  
Florenci Serras, Universitat de Barcelona, Spain  
Flórenci Cavodeassi, St. George's University of London, United Kingdom  
Florian Steiner, University of Geneva, Switzerland  
Forrest Gulden, Yale School of Medicine, United States  
Francesca M Spagnoli, King's College London, United Kingdom  
Francesco Antonica, University of Cambridge, United Kingdom  
Francesco Tomassoni-Ardori, National Cancer Institute, United States  
Francis McNally, University of California, Davis, United States  
Francisco Pelegri, University of Wisconsin-Madison, United States  
Franck Pichaud, MRC, LMCB, United Kingdom  
Francois Graner, University Paris Diderot, France  
Francois Guillemot, The Crick Institute - Mill Hill Laboratory, United Kingdom  
Francois Parcy, CNRS, France  
Francois Schweisguth, Institut Pasteur, France  
Frank Costantini, Columbia University, United States  
Frank L Conlon, University of North Carolina, United States  
Frank Lovicu, University of Sydney, Australia  
Frank Schnorrer, IBDM, France  
Frauke Augstein, Uppsala University, Sweden  
Fred A Pereira, Baylor College of Medicine, United States  
Fred H. Gage, Salk Institute, United States  
Frederic Berger, Gregor Mendel Institute, Singapore  
Frederic Charron, Institut de recherches cliniques de Montreal, Canada  
Frédéric Clotman, Université catholique de Louvain, Belgium  
Frederic Lemaigre, Université catholique de Louvain, Belgium  
Frederic Michon, Institute of Biotechnology, Finland  
Fredrik K A Lanner, Karolinska Institutet, Sweden  
Fuchou Tang, Biodynamics Optical Imaging Center (BIOPIC), China  
Fugaku Aoki, University of Tokyo, Japan  
Fumitoshi Ishino, Medical Research Institute, Tokyo Medical and Dental University, Japan  
G. Giacomo Consalez, San Raffaele Scientific Institute, Italy  
Gabriella Minchiotti, Institute of Genetics and Biophysics A Buzzati-Traverso, Italy  
Gabrielle Kardon, University of Utah, United States  
Gad Shaulsky, Baylor College of Medicine, United States  
Gael Castel, Centre de Recherche en Transplantation et Immunologie, France  
Gage Crump, University of Southern California Keck School of Medicine, United States  
Gaia Gestri, UCL, United Kingdom  
Gaia Tavosanis, DZNE, Germany  
Gail Risbridger, Monash University, Australia  
Gantas Perez-Mockus, National Institute Medical Research, United Kingdom  
Gary Felsenfeld, NIH, United States  
Gary Ruvkun, Massachusetts General Hospital, United States  
Gary Wessel, Brown University, United States  
Gavin Kelsey, Babraham Institute, United Kingdom  
Ge Guo, University of Cambridge, United Kingdom

Gen Yamada, Wakayama Medical University, Japan  
Georg Dechant, Innsbruck Medical University, Austria  
Georg Halder, Universiteit Leuven, Belgium  
Georg Vogler, Sanford-Burnham Medical Res. Inst., United States  
Geraldine Seydoux, Johns Hopkins U. School of Medicine, United States  
Gerard Campbell, University of Pittsburgh, United States  
Gerard Gradwohl, IGBMC, France  
Gerard Ruiz-Babot, William Harvey Research Institute, United Kingdom  
Gerhard Schlosser, National University of Ireland, Galway, Ireland  
Gerrit Begemann, University of Bayreuth, Germany  
Giacomo Cavalli, National de la Recherche Scientifique, France  
Gian Garriga, University of California, United States  
Gianluca Gallo, -, United States  
Gilbert Weidinger, Ulm University, Germany  
Ginam Cho, Harvard Medical School, United States  
giuliano giuseppe stirparo, university of cambridge, United Kingdom  
Gordon Keller, MaRS Centre, Canada  
Gordon Weir, Joslin Diabetes Center, United States  
Gou Young Koh, KAIST, Korea, Republic of  
Graeme Mardon, Baylor College of Medicine, United States  
Grant Mastick, University of Nevada, United States  
Grant N Wheeler, University of East Anglia, United Kingdom  
Graziano Martello, University of Padua, United Kingdom  
Greg Barsh, Stanford University School of Medicine, United States  
Greg Beitel, Northwestern University, United States  
Greg Findlay, University of Dundee, United Kingdom  
Greg Fitzharris, Universite de Montreal, Canada  
Gregg Howe, MSU-DOE, United States  
Grégoire Michaux, CNRS - IGDR, France  
Gregor Bucher, Georg-August-Universität, Germany  
Gregory T Reeves, North Carolina State University, United States  
Guang Li, Xiamen University, China  
Guido Grossmann, University of Heidelberg, Germany  
Guillaume Blin, MRC-Center for Regenerative Medicine, United Kingdom  
Guillaume Halet, CNRS UMR 6061, France  
Guillaume Salbreux, The Francis Crick Institute, United Kingdom  
Guillermina Lopez-Bendito, Instituto de Neurociencias de Alicante, Spain  
Guo Huang, University of California, San Francisco, United States  
Guojun Sheng, Kumamoto University, Japan  
Guy Tear, Kings College London, United Kingdom  
Gwyneth Ingram, Ecole Normale Supérieure de Lyon, France  
Gyung-Tae Kim, Dong-A University, Korea, Republic of  
H. Joseph Yost, University of Utah, United States  
H. Scott Baldwin, Vanderbilt University Medical Center, United States  
Halyna Shcherbata, Max Planck Institute for biological chemistry, Germany  
Hanna Mikkola, University of California, United States  
Hannele Tuominen, Umea Plant Science Centre, Sweden  
Hans Clevers, University Medical Center, Netherlands  
Hansong Ma, University of Cambridge, United Kingdom  
Hans-Reimer Rodewald, German Cancer Research Center (DKFZ), Germany  
Hans-Willem Snoeck, Columbia University Medical Center, United States  
Hao Liu, University of Michigan, United States  
Hao Peng, Washington State University, United States  
Hao Zhu, UT Southwestern, United States  
Haojia Wu, Washington University School of Medicine in St Louis, United States  
Hardik Gala, University of Washington, United States  
Harry Leitch, Imperial College London, United Kingdom  
Haruhiko Koseki, RIKEN, Japan  
Haruhiko Miyata, Osaka University, Japan  
Haruhiko Siomi, Keio University School of Medicine, Japan

Hedia Chagraoui, University of Oxford, United Kingdom  
Hedia Chagraoui; Dr Arif Kirmizitas, University of Oxford, United Kingdom  
Hei Sook Sul, University of California, Berkeley, United States  
Heiko Lickert, Helmholtz Zentrum Munchen, Germany  
Heinrich Jasper, Buck, United States  
Helen Morrison, Fritz Lipmann Institute, Germany  
Helen Rowe, University College London, United Kingdom  
Helen Salz, Case Western Reserve University, United States  
Helena Arents, VIB/Ghent University, Belgium  
Helena M Araujo, Federal University of Rio de Janeiro, Brazil  
Helene S Robert, CEITEC Masaryk University, Czech Republic  
Hélène Vignes, IGBMC, France  
Hendrik C Korswagen, Hubrecht Institute, Netherlands  
Heng-Yu Fan, Zhejiang University, China  
Henk Roelink, UC Berkeley, United States  
Henrik Jönsson, Cambridge University, United Kingdom  
Henrik Semb, Lund University, Sweden  
Herman Steller, The Rockefeller University, United States  
Hermann Aberle, Heinrich-Heine-Universitaet Duesseldorf, Germany  
Hervé Turlier, Collège de France, France  
Heymut Omran, University of Munster, Germany  
Hideki Enomoto, Graduate School of Medicine, Kobe University, Japan  
Hidenobu Miyazawa, EMBL Heidelberg, Germany  
Hidenobu Soejima, Saga University, Japan  
Hidetoshi Iida, Tokyo Gakugei University, Japan  
Hilde Nelissen, VIB-UGent Center for Plant Systems Biology, Belgium  
Himanshu Kaul, University of Toronto, Canada  
Hiroaki Katsura, Duke, United States  
Hiroki Nishida, Osaka University, Japan  
Hiromitsu Nakauchi, University of Stanford, United States  
Hironobu Fujiwara, RIKEN CDB, Japan  
Hiroshi Asahara, Tokyo Medical and Dental University Graduate School of Medical and Dental Sciences, Japan  
Hiroshi Hamada, RIKEN, Japan  
Hiroshi Sasaki, Osaka University, Japan  
Hiroyuki Nakajima, NCVC, Japan, Japan  
Hisato Kondoh, Kyoto Sangyo University, Japan  
Hisayoshi Nozaki, University of Tokyo, Japan  
Hitoshi Gotoh, Kyoto Prefectural University of Medicine, Japan  
Hitoshi Niwa, Kumamoto University, Japan  
Holger Gerhardt, Max-Delbrueck-Center for Molecular Medicine in the Helmholtz Association (MDC), Germany  
Hong Wang, University of Saskatchewan, Canada  
hongtao chen, Princeton University, United States  
Hugh Dickinson, University of Oxford, United Kingdom  
Hugh R Woodland, University of Warwick, United Kingdom  
Hugo J. Parker, Stowers Institute, United States  
Hugo Stocker, ETH Zürich, Switzerland  
Humphrey Yao, NIEHS, United States  
Hynek Wichterle, Columbia University Medical Center, United States  
Hyun Soo Cho, KAIST, Korea, Republic of  
Iain T Shepherd, Emory University, United States  
Ian C. Scott, The Hospital for Sick Children, Canada  
Ian Chambers, University of Edinburgh, United Kingdom  
Ibrahim John Domian, Massachusetts General Hospital, United States  
Ichiro Masai, Okinawa Institute of Science and Technology Graduate University, Japan  
Ido Sagi, The Hebrew University of Jerusalem, Israel  
Ignacio Moreno de Alboran, Centro Nacional de Biotecnología, Spain  
Igor Iatsenko, EPFL, Switzerland  
Igor Igorevich Adameyko, Karolinska Institutet, Sweden

Ilan Davis, The University of Oxford, United Kingdom  
Ildiko Somorjai, University of St Andrews, United Kingdom  
Ilha Lee, Seoul National University, Korea, Republic of  
Ines Lahmann, Max-Delbrück-Centrum für Molekulare Medizin, Germany  
Ingolf Reim, Friedrich-Alexander University of Erlangen-Nürnberg, Germany  
Ioanna Mastromina, University of Dundee, United Kingdom  
Ioannis Kasioulis, University of Dundee, United Kingdom  
Iqbal Ahmad, Univ Nebraska Medical Center, United States  
Irene Cheng, University of Virginia, United States  
Irene Hadjidemetriou, William Harvey Research Institute, United Kingdom  
Irene Miguel-Aliaga, MRC Clinical Sciences Centre, United Kingdom  
Iris Salecker, The Francis Crick Institute, United Kingdom  
Iris Sevillem, University of Cambridge, United Kingdom  
Irma Thesleff, Univ of Helsinki, Finland  
Isaac H Bianco, University College London, United Kingdom  
Isabel Farinas, Universidad de Valencia, Spain  
Isabel Holguera, New York University, United States  
Isabel M Palacios, University of Cambridge, United Kingdom  
Isabelle Caille, Equipe Avenir/INSERM, France  
Isabelle Mansuy, University of Zurich, Switzerland  
Isabelle Migeotte, IRIBHM, Belgium  
Isao Matsuo, Research Institute, Osaka Women's and Children's Hospital, Japan  
Iswar Hariharan, University of California, United States  
Itsuki Ajioka, Tokyo Medical and Dental University, Japan  
Ivan P. Moskowitz, The University of Chicago, United States  
Ivonne Sehring, Ulm University, Germany  
Jaclyn Camuglia, MIT, United States  
Jacob Hanna, Weizmann Institute of Science, Israel  
Jacqueline Ho, University of Pittsburgh, United States  
Jacques Drouin, Institut de recherches cliniques de Montréal (IRCM), Canada  
Jacques MONTAGNE, CGM CNRS, France  
Jafar Sharif, RIKEN-IMS, Japan  
Jaime Rivera, University of Massachusetts Medical School, United States  
James Briscoe, The Francis Crick Institute, United Kingdom  
James Castelli-Gair Hombría, CSIC/JA/Universidad Pablo de Olavide, Spain  
James Douglas Engel, University of Michigan Medical School, United States  
James Douglas McGhee, University of Calgary, Canada  
James E Schwob, Tufts University School of Medicine, United States  
James G. Tidball, University of California Los Angeles, United States  
James H Westwood, Virginia Tech, United States  
James M Fadool, Biological Science, United States  
James MA Turner, MRC NIMR, United Kingdom  
James Martin, Baylor College of Medicine, United States  
James Palis, University of Rochester Medical Center, United States  
James R Monaghan, Northeastern University, United States  
James STRUTT, Institute of Medical Biology, Singapore  
James Weller, University of Tasmania, Australia  
James Y.H. Li, University of Connecticut Health Center, United States  
Jamie A Davies, University of Edinburgh, United Kingdom  
Jamie Little, Columbia University, United States  
Jamie Verhyeden, University of California, United States  
Jan Jensen, Cleveland Clinic, United States  
Jan Kitajewski, University of Illinois Chicago, United States  
Jan Øvrebø, German Cancer Research Center (DKFZ)-, Germany  
Jan Philipp Junker, MDC Berlin, Germany  
Jan Pielage, Technische Universität Kaiserslautern, Germany  
Jan U Lohmann, University of Heidelberg, Germany  
Jan V Kaslin, Australian Regenerative Medicine Institute, Australia  
Jane Johnson, University of Texas, United States  
Janet Rossant, The Hospital for Sick Children, Canada



Janna Leiz, Max-Delbrueck Center for Molecular Medicine, Germany  
Jantje Gerdes, Institute of Diabetes and Regeneration Research, Germany  
Jared Talbot, The Ohio State University, United States  
Jason Fish, University of Toronto, Canada  
Jason Hodin, University of Washington, United States  
Jason Rock, Boston University, United States  
Jason Spence, University of Michigan, United States  
Jason Tennesen, University of Indiana, United States  
Javad Rasouly, Max Planck Institute, Germany  
Jay B Bikoff, St Jude Children's Research Hospital, United States  
Jayaraj Rajagopal, Harvard University, United States  
Jean-Claude Labbe, Université de Montréal, Canada  
Jean-Loup Duband, Université Pierre et Marie Curie, France  
Jean-Paul Vincent, National Institute Medical Research, United Kingdom  
Jean-Rene Huynh, Collège de France, France  
Jeff A Long, UCLA, United States  
Jeff Lee, The University of Oxford, United Kingdom  
Jeff Simon, University of Minnesota, United States  
Jeffery Axelrod, Stanford University Sch. of Med., United States  
Jeffrey Gross, University of Pittsburgh School of Medicine, United States  
Jeffrey Hildebrand, University of Pittsburgh, United States  
Jeffrey Pollard, Albert Einstein Coll of Med, United States  
Jelle van den Aamele, University of Cambridge, United Kingdom  
Jen Sheen, Massachusetts General Hospital, United States  
Jenna L Galloway, Massachusetts General Hospital, United States  
Jennifer C Hocking, University of Alberta, Canada  
Jennifer L Fish, University of Massachusetts Lowell, United States  
Jennifer Malin, New York University, United States  
Jennifer McKey, Duke University Medical Center, United States  
Jennifer Nemhauser, University of Washington, United States  
Jennifer Nichols, University of Cambridge, United Kingdom  
Jennifer Zallen, Sloan-Kettering Institute, United States  
Jenny Hsieh, The University of Texas at San Antonio, United States  
Jens Januschke, University of Dundee - School of Life Sciences, United Kingdom  
Jeong Hoe Kim, Kyungpook National University, Korea, Republic of  
Jeremy Kay, Duke, United States  
Jeremy Nathans, Johns Hopkins Univ Sch of Med, United States  
Jeremy Purvis, University North Carolina, United States  
Jeremy Wang, University of Pennsylvania, United States  
jernež Ule, The Francis Crick Institute, United Kingdom  
Jeroen Bakkers, Hubrecht Institute, Netherlands  
Jerome Chal, Brigham and Women's Hospital, United States  
Jerome Collignon, Institut Jacques Monod, France  
jerome Solon, CRG, Spain  
Jerry Workman, Stowers Institute for Medical Research, United States  
Jesse Mager, University of Massachusetts, United States  
Jessica L. Whited, Harvard Medical School and Brigham & Women's Hospital, United States  
Jiandong Liu, unc-chapel hill, United States  
Jianfei Zhao, University of Pennsylvania, United States  
Jiang Chen, Stony Brook University, United States  
Jianlong Wang, Mount Sinai School of Medicine, United States  
Jianwen Que, Columbia University Medical Center, United States  
Jiao Li, NIBS, China  
Jia-Wei Wang, Institute of Plant Physiology and Ecology, CAS, China  
Jill Christine Preston, University of Vermont, United States  
Jill Harrison, Bristol University, United Kingdom  
Jim Mondo, University of California, United States  
Jing Liu, Chinese Academy of Sciences, China  
Jing Zhang, University of Helsinki, Finland  
Jingjing Sun, Caltech - Pasadena, United States

Jingli Cao, Duke University Medical Center, United States  
Jinxing Lin, Institute of Botany, Chinese Academy of Sciences, China  
Ji-Young Lee, Seoul National University, Korea, Republic of  
Joachim Wittbrodt, Heidelberg University, Germany  
Joana Paes de Faria, IBMC, Portugal  
João B Relvas, IBMC, Portugal  
Jocelyn A McDonald, Kansas State University, United States  
Jody Rosenblatt, Huntsman Cancer Institute, United States  
Joe LoTurco, University of Connecticut, United States  
Joep Beumer, University Medical Center, Netherlands  
Johan Jakobsson, Lund University, Sweden  
Johanes von Lintig, Case Western Reserve University, United States  
Johanna Farkas, Northeastern University, United States  
Johannes Söding, MPI for Biophysical Chemistry, Germany  
John Alvarez, Monash, Australia  
John Amory, University of Washington, United States  
John Aplin, U Manchester, United Kingdom  
John B Wallingford, UT Austin, United States  
John Bowman, Monash, Australia  
John Eppig, The Jackson Laboratory, United States  
John Ewer, Universidad de Valparaiso, Chile  
John F Rawls, Department of Molecular Genetics and Microbiology, Duke University, Durham, USA, United States  
John Gerhart, University of California, United States  
John Marion, -, United Kingdom  
John Plenefisch, University of Toledo, United States  
John Robert Davis, Cancer Research UK London Research Institute, United Kingdom  
John Rubenstein, UCSF, United States  
John Tamkun, University of California, Santa Cruz, United States  
John Wysolmerski, Yale University, United States  
Joice Stipursky, Universidade Federal do Rio de Janeiro, Brazil  
Jon M Oatley, Washington State University, United States  
Jonathan Chubb, UCL, United Kingdom  
Jonathan Clarke, MRC Centre for Developmental Neurobiology, United Kingdom  
Jonathan Gale, UCL Ear Institute, United Kingdom  
Jonathan Raper, Penn School of Medicine, United States  
Jonathan Rios, Texas Scottish Rite Hospital for Children, United States  
Jonathan T Eggenschwiler, Princeton University, United States  
Joop Vermeer, University of Zurich, Switzerland  
Jordan Kreidberg, Children's Hospital Boston, United States  
Jordi Cayuso, The Francis Crick Institute, United Kingdom  
Jörg Großhans, University of Göttingen, Germany  
Jorge Casal, Institute for agricultural plant physiology and ecology, Argentina  
Jorge Ferrer, Hospital Clinic i Universitari, Spain  
Jorge Merlet, IBPS, UMR7622-CNRS-UPMC, France  
José A Belo, NOVA Medical School, Universidade Nova de Lisboa, Portugal  
José Casal, University of Cambridge, United Kingdom  
Jose Luis de la Pompa, Centro Nacional de Investigaciones Cardiovasculares Carlos III (CNIC), Spain  
Jose Luis Gomez-Skarmeta, Universidad Pablo de Olavide, Spain  
Jose Pelliccia, Princeton University, United States  
Jose R Dinneny, Carnegie Institute, United States  
Jose Silva, The Wellcome Trust Centre for Stem Cell Research, United Kingdom  
Joseph A Rothnagel, University of Queensland, Australia  
Joseph C Wu, Stanford University School of Medicine, United States  
Joseph Campanale, University of California, United States  
Joseph Colasanti, University of Guelph, Canada  
Joseph Lancman, Sanford-Bunrham Medical Research Institute, United States  
Joseph Lipsick, Stanford University, United States  
Joseph P Stains, University of Maryland, United States  
Joseph V Bonventre, Brigham and Women's Hospital/Harvard Medical School, United States

Josephine Bowles, University of Queensland, Australia  
Josh Brickman, University of Copenhagen, Denmark  
Joshua Titlow, The University of Oxford, United Kingdom  
Joshua Waxman, Cincinnati Children's Medical Center, United States  
Joy Lincoln, Nationwide Children's Hospital, United States  
Ju Hye Song, KAIST, Korea, Republic of  
Juan Carlos Zuniga-Pflucker, University of Toronto, Canada  
Juan Pablo Labrador, Trinity College Dublin, Ireland  
Juan Pedro Martinez-Barbera, Great Ormond Street UCL Institute of Child Health, United Kingdom  
Juan Ramon Martinez-Morales, CABD (CSIC/UPO), Spain  
Judith Eisen, University of Oregon, United States  
Judith Kassis, NICHD, NIH, United States  
Juerg Mueller, Max-Planck Institute of Biochemistry, Germany  
Juergen Knoblich, IMBA, Austria  
Juha Partanen, University of Helsinki, Finland  
Juhee Jeong, New York University College of Dentistry, United States  
Jukka Jernvall, University of Helsinki, Finland  
Julian Blow, University of Dundee, United Kingdom  
Juliane Münch, Potsdam University, Germany  
Julie A Brill, The Hospital for Sick Children, Canada  
Julie C Canman, Columbia University, United States  
Julie Ribot, Instituto de Medicina Molecular (IMM), Portugal  
julien Royet, IBDML, France  
Julien Vermot, IGBMC, France  
Jun Kelly Liu, Cornell University, United States  
Jun-ichi Itoh, University of Tokyo, Japan  
Jurrien Dean, National Institutes of Health, United States  
Justin C St. John, Hudson Institute of Medical Research, Australia  
Justin Crocker, European Molecular Biology Laboratory, Heidelberg, Germany  
Justin Lowenthal, Johns Hopkins University, United States  
Justin P. Kumar, Indiana University, United States  
Jute Pat, NYU School of Medicine and HHMI, United States  
K. Lenhard Rudolph, Leibniz Institute on Aging - Fritz Lipmann Institute, Germany  
Kai M Schmidt-Ott, Max-Delbrueck Center for Molecular Medicine, Germany  
Kai Zinn, CalTech, United States  
Kamila Delaney, University of Geneva, Switzerland  
Kang Shen, Stanford University, United States  
Kang-Yu Tai, National Taiwan University, Taiwan  
Kara Cerveney, Reed College, United States  
Karen Echeverri, Stem Cell Institute, University of Minnesota, United States  
Kari Alitalo, University of Helsinki, Finland  
Kari Vahtomeri, University of Helsinki, Finland  
Karin van der Burg, Cornell University, United States  
Karina Yaniv, Weizmann Institute of Science, Israel  
Karine Rizzoti, The Francis Crick Institute, United Kingdom  
Karl Pfeifer, National Institutes of Health, United States  
Karl Swann, Cardiff University, United Kingdom  
Karuna Sampath, University of Warwick, United Kingdom  
Kate G Storey, University of Dundee, United Kingdom  
Katherine Yutzey, Children's Medical Center Cincinnati, United States  
Kathleen Whitlock, Universidad de Valparaiso, Chile  
Kathrin Schrick, Kansas State University, United States  
Kathryn Anderson, Sloan-Kettering Institute, United States  
Kathy Foltz, UCSB, United States  
Kathy Lui, CUHK, Hong Kong  
Katia Ancelin, Institut Curie, France  
Katie Abley, University of Cambridge, United Kingdom  
Katie Sinagoga, University of Pittsburgh School of Medicine, United States  
Katie Yergert, University of Colorado Denver, United States  
Katja Brueckner, University of California San Francisco, United States

Katja Roeper, MRC-Laboratory of Molecular Biology, United Kingdom  
Katsuhiko Ono, Kyoto Prefectural University of Medicine, Japan  
Kaushiki Menon, CalTech, United States  
Kay Schneitz, TU Munich, Germany  
Kazuo Emoto, The University of Tokyo, Japan  
Kazuya Ono, National Institute on Deafness, United States  
Kazuyuki Ohbo, Yokohama City University, School of Medicine, Japan  
Kei Fukuda, RIKEN, Japan  
Keiji Tanaka, Laboratory of Frontier Science, Tokyo Metropolitan Institute of Medical Science, Japan  
Keiji Tanimoto, University of Tsukuba, Japan  
Keiko Torii, University of Washington, United States  
Keisuke Itoh, Graduate School of Medicine, Kobe University, Japan  
Keith Lindsey, Durham University, United Kingdom  
Kellee Siegfried, University of Massachusetts Boston, United States  
Kelly Smith, The University of Queensland, Australia  
Kelvin Yeung, Baylor College of Medicine, United States  
Ken Zaret, University of Pennsylvania School of Medicine, United States  
Kendal S Broadie, Vanderbilt University, United States  
Kenichiro Furuyama, University of Geneva Faculty of Medicine, Switzerland  
Kenji Matsuno, Tokyo University of Science, Japan  
Kenneth Cho, University of California-Irvine, United States  
Kenneth Irvine, Rutgers / HHMI, United States  
Kenneth Poss, Duke University Medical Center, United States  
Kerri Hunter, University of Helsinki, Finland  
Kerstin Wilhelm, Max Planck Institute, Germany  
Kieran Harvey, Peter MacCallum Cancer Centre, Australia  
Kim F Rewitz, University of Copenhagen, Denmark  
Kim J Dale, University of Dundee, United Kingdom  
Kim Jensen, University of Copenhagen, Denmark  
Kim McCall, Boston University, United States  
Kim McKim, Rutgers University, United States  
Kimara Targoff, Columbia University, United States  
Kimberly Johnson, Harvard Medical School and Brigham & Women's Hospital, United States  
Kinichi Nakashima, Kyushu University, Graduate School of Medical Sciences, Japan  
Klemens Rottner, HZI Braunschweig, Germany, Germany  
Koichi Toyokura, Kobe University, Japan  
Komal Raja, Baylor College of Medicine, United States  
Konrad Basler, University of Zurich, Switzerland  
Konrad Hochedlinger, Harvard University, United States  
Konstantinos Chronis, UCLA, United States  
Kosuke Hashimoto, RIKEN Center for Life Science Technologies, Japan  
Kotaro Sasaki, Graduate School of Medicine, Kyoto University, Japan  
Kris Vissenberg, University of Antwerp, Belgium  
Kristi Schaefer, University of North Carolina, United States  
Kristin Artinger, UC Denver AMC, United States  
Kristy Red-Horse, Stanford University, United States  
Krzysztof Jagla, INSERM, France  
Krzysztof Kobiela, University of Warsaw, Poland  
Ksenia Gnedeva, Keck School of Medicine of University of Southern California, United States  
Kyo-ichi Isono, Wakayama Medical University, Japan  
Kyra A Campbell, University of Sheffield, United Kingdom  
Lachlan James Smith, University of Pennsylvania, United States  
Lacy Barton, NYU School of Medicine and HHMI, United States  
Lamiré Laurie-Anne, Université Claude Bernard, France  
Lance Davidson, University of Pittsburgh, United States  
Lara Al'zouabi, Institut Curie, France  
Larry Taber, Washington University, United States  
Lars Ostergaard, John Innes Centre, United Kingdom  
Lasse Dissing Olesen, Harvard Medical School, United States

Laszlo Bogre, University of London, United Kingdom  
Laura A Johnston, Columbia University, United States  
Laura Attardi, Stanford University Medical Center, United States  
Laura Buttitta, University of Michigan, United States  
Laura Dixon, John Innes Centre, United Kingdom  
Laura Fontenas, University of Virginia, United States  
Laura Lopez Mascaraque, Instituto Cajal (CSIC), Spain  
Laura N Borodinsky, UC Davis, United States  
Laure Bally-Cuif, CNRS and Institut Pasteur, France  
Laurent David, Centre de Recherche en Transplantation et Immunologie, France  
Laurent Kodjabachian, IBDM, France  
Laurent Nguyen, Université de Liege, Belgium  
Laurinda A. Jaffe, Univ of CT, United States  
Lautaro Gandara, Instituto Leloir, Argentina  
Leah Foltz, University of California, Santa Barbara, United States  
Lee Niswander, University of Colorado Boulder, United States  
Lei Lei, Univ of Michigan Medical School, United States  
Leif Oxburgh, Maine Medical Center Research Institute, United States  
Leigh Coultas, Walter & Eliza Hall Institute of Medical Research, Australia  
Leonard Zon, HHMI/Children's Hospital Boston, United States  
Leonardo Guasti, William Harvey Research Institute, United Kingdom  
Leonid Peshkin, Harvard Medical School, United States  
Lesley Brown, NICHD/NIH, United States  
Leslie Pick, University of Maryland, United States  
Lewis Charles Murtaugh, University of Utah, United States  
Li Qian, University of North Carolina at Chapel Hill, United States  
Liam Dolan, University of Oxford, United Kingdom  
Licia Selleri, UCSF, United States  
Lihua Ye, Department of Molecular Genetics and Microbiology, Duke University, Durham, USA, United States  
Lilianna Solnica-Krezel, Washington University School of Medicine, United States  
Lina Duan, Carnegie Institute, United States  
Lindsay Hinck, University of California, Santa Cruz, United States  
Lindsey Barske, University of Southern California Keck School of Medicine, United States  
Ling Qin, University of Pennsylvania, United States  
Lingyi Chen, Nankai University, China  
Lino Tessarollo, National Cancer Institute, United States  
Lionel Christiaen, NYU, United States  
Lionel Pintard, CNRS, France  
Lisa L Sandell, University of Louisville, United States  
Lisa Petrella, Marquette University, United States  
Lisa V. Goodrich, Harvard Medical School, United States  
Lisa Vrooman, UPENN, United States  
Lixing W Reneker, University of Missouri, United States  
Liz Lacy, Sloan-Kettering Institute, United States  
Liz Robertson, University of Oxford, United Kingdom  
Loksum Wong, National Institute on Deafness, United States  
Lomeli Shull, UC Denver AMC, United States  
Lothar Hennighausen, National Institutes of Health, United States  
Lothar Kalmbach, University of Cambridge, United Kingdom  
Louis Lefebvre, University of British Columbia, Canada  
Louis-Jan Pilaz, Duke University Medical Center, United States  
LS SHASHIDHARA, Indian Institute of Science Education and Research (IISER), India  
Lu M Yang, Washington University in St Louis School of Medicine, United States  
Lucas Waltzer, Laboratoire Génétique Reproduction et Développement, France  
Lucia Colombo, University of Milan, Italy  
Lucia Poggi, University of Trento, Italy  
Ludovic Vallier, Cambridge University, United Kingdom  
Luis Alberto Baena Lopez, University of Oxford, United Kingdom  
Luis Bonet-Ponce, National Institute on Aging, United States



Luisa Cochella, IMP Vienna, Austria  
Luisa Iruela-Arispe, UCLA, United States  
Lydia Sorokin, WWU Munster, Germany  
Lydie Flasse, DanStem, Univeristy of Copenhagen, Denmark  
Lynn M Riddiford, University of Washington, United States  
Lynn Pillitteri, Western Washington University, United States  
Lyuba Ryabova, CNRS - Institut de Biologie Moléculaire des Plantes, France  
M A Dyer, St. Jude Children's Research Hospital, United States  
M. D. Gershon, Columbia University, United States  
M.Dolors Piulachs, Institut de Biologia Evolutiva (UPF-CSIC), Spain  
Maciej Lapinski, International Institute of Molecular and Cell Biology in Warsaw, Poland  
Madelaine Bartlett, UMass Amherst, United States  
Madeline Lancaster, MRC Laboratory of Molecular Biology, United Kingdom  
Magali Suzanne, Toulouse, France  
Magdalena Goetz, Stem Cell Institute, Germany  
Magdalena Zak, UCL Ear Institute, United Kingdom  
Magdalena Zernicka-Goetz, University of Cambridge, United Kingdom  
Makoto Sato, Kanazawa University, Japan  
Makoto Tachibana, Institute for Virus Research, Kyoto University, Japan  
Malcolm Logan, King's College London, United Kingdom  
Malcolm Maden, University of Florida, United States  
Mana Parast, University of California San Diego, United States  
Manfred Frasch, University of Erlangen Nuremberg, Germany  
Manfred Schartl, University of Wuerzburg, Germany  
Mansi Srivastava, O, United States  
Manuel Pineiro, Madrid Polytechnic University, Spain  
Marc Freeman, Vollum Institute, United States  
Marc Halfon, SUNY at Buffalo, United States  
Marcelo Boareto, ETH Zürich, Switzerland  
Marco Milan, Institut de Recerca Biomedica (IRB), Spain  
Marcos Simoes-Costa, California Institute of Technology, United States  
Marcus Pembrey, University of Bristol, United Kingdom  
Mardelle Atkins, Universiteit Leuven, Belgium  
Marek Jindra, Biology Center ASCR, Czech Republic  
Marek Mlodzik, Mt Sinai School of Medicine, United States  
Marella de Bruijn, MRC, United Kingdom  
Maren Engelhardt, Medical Faculty Mannheim, Heidelberg University, Germany  
Margaret de Cuevas, Johns Hopkins University School of Medicine, United States  
Margot Bowen, Stanford University Medical Center, United States  
Maria Cristina Nostro, McEwen Stem Cell Institute/UHN, Canada  
Maria Dolores Martin-Bermudo, University Pablo de Olavide., Spain  
Maria Dominguez, CSIC (Spanish Research Council), Spain  
Maria Figueres-Oñate, Instituto Cajal (CSIC), Spain  
Maria Genander, Karolinska Institutet, Sweden  
Maria J Donoghue, Georgetown University, United States  
Maria Kriebel, University of Göttingen, Germany  
Maria Leptin, Universität zu Köln, Germany  
Maria Mikedis, Whitehead institute, United States  
Maria Rostovskaya, University of Cambridge, United Kingdom  
Maria Spletter, IBDM, France  
Marian Ros, Instituto de Biomedicina y Biotecnología de Cantabria, Spain  
Mariana Wolfner, Cornell University, United States  
Marianne Eliabeth Bronner, California Institute of Technology, Pasadena, United States  
Marie-Andree Akimenko, University of Ottawa, Canada  
Marie-Laure Baudet, University of Trento, Italy  
Marija Matejcic, Max Planck Institute, Germany  
Mario De Felice, Università degli Studi di Napoli Federico II , Naples, Italy  
marisa Karow, Ludwig Maximilians University Munich, Germany  
Marja L. Mikkola, University of Helsinki, Finland  
Mark Cookson, National Institute on Aging, United States

Mark Ditzel, Edinburgh University, United Kingdom  
Mark Huisling, University of California, Davis, United States  
Mark Lush, Stowers Institute for Medical Research, United States  
Mark Mattson, National Institute on Aging, United States  
Mark Minow, University of Guelph, Canada  
Mark Peifer, University of North Carolina, United States  
Mark Rebeiz, University of Pittsburgh, United States  
Mark Sharpley, Univ of California, United States  
Mark Van Doren, Johns Hopkins University, United States  
Marko Popovic, Francis Crick Institute/University College London, United Kingdom  
Markus Affolter, University of Basel, Switzerland  
Marnie Halpern, Carnegie Institution for Science, United States  
Mart Saarma, University of Helsinki, Finland  
Marta Laskowski, Oberlin College, United States  
Marta Llimargas, Institut de Biologia Molecular de Barcelona, Spain  
Marta Murray, University of Dundee, United Kingdom  
Martha Echevarria Andino, University of Michigan, United States  
Martha Hunter, University of Arizona, United States  
Martin Bayer, Max Planck Institute for Developmental Biology, Germany  
Martin Blum, Universitaet Hohenheim, Germany  
Martin Breuss, UCSD, United States  
Martin Crespi, Institute of Plant Sciences Paris-Saclay, France  
Martin Klingler, University Erlangen, Germany  
Martin Leeb, University of Vienna, Austria  
Martin Lowe, University of Manchester, United Kingdom  
Martin Pera, Jackson Laboratory, United States  
Martina Brueckner, Yale University School of Medicine, United States  
Mary Ann Handel, The Jackson Laboratory, United States  
Mary Baylies, Memorial Sloan-Kettering Cancer Center, United States  
Mary C. Mullins, University of Pennsylvania, United States  
Mary Halloran, University of Wisconsin, United States  
Mary Lou King, University of Miami, United States  
Mary P. Lee, University of Michigan Medical School, United States  
Marysia A. Placzek, University of Sheffield, United Kingdom  
Masaaki Komatsu, Niigata University, Japan  
Masahiro Kanaoka, Nagoya University, Japan  
Masahito Ikawa, Osaka University, Japan  
Masaki Inagaki, Mie University Graduate School of Medicine, Japan  
Masanori Hirashima, Kobe University, Japan  
Masato Nakafuku, Cincinnati Children's Hospital Research Foundation, United States  
Masayuki Miura, Grad. Sch. Pharm. Sci., University Tokyo, Japan  
Masazumi Tada, University College London, United Kingdom  
Mason Posner, Ashland University, United States  
Mateus Adolfi, University of Wuerzburg, Germany  
Mathias Treier, Max-Delbrück Center for Molecular Medicine (MDC), Germany  
Matthew Buechner, University of Kansas, United States  
Matthew Kelley, NIH, United States  
Matthew L Warman, Harvard Sch of Med., United States  
Matthew Philip Hoffman, National Institutes of Health, United States  
Matthew Ronshaugan, University of Manchester, United Kingdom  
Matthew Stower, University of Oxford, United Kingdom  
Matthew Towers, University of Sheffield, United Kingdom  
Matthias Lutolf, EPF Lausanne, Switzerland  
Maurice van den Hoff, University of Amsterdam, Netherlands  
Mauricio Rocha Martin, Max Planck Institute, Germany  
Maxime Bouchard, McGill University, Canada  
Maximilien Courgeon, New York University, United States  
Maya Capelson, University of Pennsylvania, United States  
Maya Spichal, University of North Carolina, United States  
Megan Williams, University of Utah, United States

Mei Li, Institut de Génétique et de Biologie Moléculaire et Cellulaire (IGBMC), Illkirch, France, France  
Meirelle Khacho, University of Ottawa, Canada  
Melinda Larsen, University at Albany, SUNY, United States  
Melissa H Little, Murdoch Children's Research Institute, Australia  
Melissa Mann, University of Western Ontario/, Canada  
Meng Li, Cardiff Uni, United Kingdom  
Meritxell Huch, Wellcome Trust/Cancer Research UK-Gurdon Institute, United Kingdom  
Merve Deniz Abdusselamoglu, IMBA, Austria  
Mervin Yoder, Indiana University School of Medicine, United States  
Micah Gearhart, University of Minnesota, United States  
Michael Boutros, DKFZ, Germany  
Michael Brand, TU Dresden, Germany  
Michael Buszczak, UT Southwestern, United States  
Michael Caplan, Yale University, United States  
Michael Galko, The University of Texas, United States  
Michael Glotzer, The University of Chicago, United States  
Michael Griswold, University of Washington, United States  
Michael J Layden, Lehigh University, United States  
Michael Kuhl, Ulm University, Germany  
Michael Lampson, University of Pennsylvania, United States  
Michael Lenhard, Universität Potsdam, Germany  
Michael Levin, Tufts University, United States  
Michael Morgan, -, United Kingdom  
Michael Pack, Uiversity of Pennsylvania, United States  
Michael Piacentino, California Institute of Technology, Pasadena, United States  
Michael Potente, Max Planck Institute, Germany  
Michael R Deans, University of Utah, United States  
Michael Rotelli, Indiana University, United States  
Michael Rudnicki, Ottawa Health Research Institue, Canada  
Michael Schneider, Imperial College London, United Kingdom  
Michael Sendtner, University of Wuerzburg, Germany  
Michael Sheets, University of Wisconsin, Madison, United States  
Michael Staring, K.U.Leuven, Belgium  
Michael Wrzaczek, University of Helsinki, Finland  
Michael Y Fessing, University of Bradford, United Kingdom  
Michaela Frye, University of Cambridge, United Kingdom  
Micheal Way, The Francis Crick Institute, United Kingdom  
Michel Bagnat, Duke University, United States  
Michel Cayouette, Institut rech cliniqu Montreal, Canada  
Michel Labouesse, IGBMC, France  
Michel Puceat, INSERM, France  
Michele A Battle, Medical College of Wisconsin, United States  
Michele Studer, Institute of Biology Valrose, iBV, France  
Michelle Collins, Max Planck Institute, Germany  
Michelle Savage, K.U. Leuven, United States  
Michelle Starz-Gaiano, UMBC, United States  
Miguel Angel Moreno-Mateos, CABD-UPO, Spain  
Miguel Blazquez, IBMCP (CSIC-UPV), Spain  
Miguel Concha, Universidad de Chile, Chile  
Miguel Constanca, University of Cambridge, United Kingdom  
Miguel Torres, CNIC, Spain  
Mike Attwaters, King's College London, United Kingdom  
Mike Levine, Princeton University, United States  
Mikhail Kolonin, University of Texas Health Science Center at Houston , United States  
Min Ni, University of Minnesota, United States  
Mina Gouti, Max Delbruck Centre, Germany  
Mina J. Bissell, Lawrence Berkeley National Laboratory, United States  
Mingfu Wu, Albany Medical College, United States  
Mireille Montcouquiol, Inserm, France

Mitinori Saitou, Graduate School of Medicine, Kyoto University, Japan  
Mitzi I. Kuroda, Brigham and Women's Hospital, United States  
Moe Kitazawa, Medical Research Institute, Tokyo Medical and Dental University, Japan  
Mo-Fang Liu, Shanghai Institute for Biological Sciences, China  
Moises Mallo, Inst. Gulbenkian de Ciencia, Portugal  
Monica Gotta, University of Geneva, Switzerland  
Moshe Biton, Broad Institute, United States  
Muriel Grammont, Université Claude Bernard, France  
Muriel Perron, Université Paris Sud, France  
Myeong Min Lee, Yonsei University, Korea, Republic of  
Myriam Roussigne, CBD, France  
Nadav Ahituv, UCSF, United States  
Nadia Mercader, Centro Nacional de Investigaciones Cardiovasculares, Spain  
Nai Yang Fu, Duke NUS Medical School, Singapore  
Nan Tang, NIBS, China  
Nancy Speck, UPenn School of Medicine, United States  
Naoki Mochizuki, National Cerebral and Cardiovascular Center Research Institute, Japan  
Naomi Nakayama, University of Edinburgh, United Kingdom  
Naomi Taylor, Montpellier, France  
Natalia Bulgakova, University of Sheffield, United Kingdom  
Natalia Mora, ICM, France  
Natalie Clark, NCSU, United States  
Natasha L Harvey, Centre for Cancer Biology, SA Pathology, Australia  
Nathalie Lamarche-Vane, mcgill university, Canada  
Nathalie Pujol, CIML CNRS, France  
Nathalie SPASSKY, INSERM, France  
Nathaniel Dyment, University of Connecticut Health Center, United States  
Navin Ramakrishnan, Wellcome Trust/Cancer Research UK Gurdon Institute, United Kingdom  
Needhi Bhalla, University of California Santa Cruz, United States  
Nefeli Slavi, Columbia University, United States  
Neha Diwanji, University of Massachusetts Medical School, United States  
Neil Hanley, University of Manchester, United Kingdom  
Neil Segil, Keck School of Medicine of University of Southern California, United States  
Nenad Sestan, Yale School of Medicine, United States  
Ng Shyh-Chang, Genome Institute of Singapore, Singapore  
Niamh Nowlan, Imperial, United Kingdom  
Nicholas Vrettos, University of Pennsylvania, United States  
Nichole Broderick, University of Connecticut, United States  
Nick Barker, Institute of Medical Biology, Singapore  
Nicola Allen, Salk Institute, United States  
Nicola Gray, The University of Edinburgh, United Kingdom  
Nicola Smart, DPAG, Oxford, United Kingdom  
Nicolas Daudet, University College London, United Kingdom  
Nicolas Tapon, Cancer Research UK London Research Institute, United Kingdom  
Nicole Glenn, St Jude Children's Research Hospital, United States  
Nicole King, University of California, Berkeley, United States  
Nicole Park, The Hospital for Sick Children, Canada  
Nicoletta Kessar, University College London, United Kingdom  
Nipam H Patel, University of California, Berkeley, United States  
Nissim Benvenisty, The Hebrew University of Jerusalem, Israel  
Nitya Ramkumar, MRC Laboratory for Molecular Cell Biology &, United Kingdom  
Noam Vardi, University of California, San Francisco, United States  
Nobue Itasaki, University of Bristol, United Kingdom  
Nobuhiro Nakamura, Tokyo Institute of Technology, Japan, Japan  
Noel Blanco-Touriñán, IBMCP (CSIC-UPV), Spain  
Noelia Anton-Bolaños, Instituto de Neurociencias de Alicante, Spain  
Norbert B. Ghyselinck, IGBMC, France  
Noriko Osumi, Tohoku University Graduate School of Medicine, Japan  
Noriyuki Tsumaki, Kyoto University, Japan  
Norman D Rosenblum, The Hospital for Sick Children, Canada

Oliver Bell, Inst of Molec Biotech (IMBA), Austria  
Oliver Hobert, Columbia University Medical Center, United States  
Olivia Bermingham-McDonogh, University of Washington, United States  
Olivier Cinquin, UC Irvine, United States  
Olivier Hamant, ENS Lyon, France  
Olov Andersson, Karolinska Institute, Sweden  
Ondine Cleaver, UT Southwestern Medical Center, United States  
Ondrej Svoboda, University of California, San Diego, United States  
Ophir D Klein, University of California, San Francisco, United States  
Oren Schuldiner, Weizmann Institute, Israel  
Ottoline Leyser, University of Cambridge, United Kingdom  
P. Duc Dong, Sanford-Burnham Medical Research Institute, United States  
Pablo H Strobl-Mazzulla, IIB-INTECH, Argentina  
Pablo Padilla Longoria, Universidad Nacional Autonoma de Mexico, Mexico  
Pablo Wappner, Instituto Leloir, Argentina  
Palle Serup, Copenhagen University, Denmark  
Pamela A Raymond, University of Michigan, United States  
Paola Bovolenta, Centro de Biologia Molecular Severo Ochoa. CSIC-UAM., Spain  
Paolo Ronchi, EMBL, Germany  
Pao-Tien Chuang, University of California San Francisco, United States  
Paride Antinucci, University College London, United Kingdom  
Parker Flowers, Yale University, United States  
Parviz Minoo, University of Southern California, United States  
Pascal de Santa Barbara, INSERM, France  
Pascal Maire, Inst. Cochin, France  
Pascale Gilardi, Ecole Normale Supérieure, France  
Paschalis Kratsios, University of Chicago, United States  
Patricia C Salinas, University College London, United Kingdom  
Patricia Rico, Centro Nacional de Biotecnología, Spain  
Patrick Allard, UCLA, United States  
Patrick Blader, UMR5547 CNRS/UPS, France  
Patrick Callaerts, K.U.Leuven & VIB, Belgium  
Patrick Laufs, IJPB, France  
Patrick Lemaire, CRBM, France  
Patrick Mueller, Friedrich Miescher Laboratory of the Max Planck Society, Germany  
Patrick P Charnay, Ecole Normale Supérieure, France  
Patrick PL Tam, Childrens Medical Research Institute, Australia  
Patrick S Western, Hudson Institute of Medical Research, Australia  
Pau Formosa Jordan, Cambridge University, United Kingdom  
Paul Donlin-Asp, Max Planck Institute, Germany  
Paul Eckhard Witten, University of Ghent, Belgium  
Paul Francois, McGill University, Canada  
Paul Frenette, Albert Einstein College of Medicine, United States  
Paul J Tesar, Case Western Reserve University, United States  
Paul Kingsley, University of Rochester Medical Center, United States  
Paul Lasko, McGill University, Canada  
Paul Martin, University of Bristol, United Kingdom  
Paul Riley, University of Oxford, United Kingdom  
Paul Schedl, Princeton University, United States  
Paul Trainor, Stowers Institute for Medical Research, United States  
Paula Alexandre, UCL- Institute of Child Health, United Kingdom  
Pauline Schaap, University of Dundee, United Kingdom  
Pauline Spéder, Institut Pasteur, France  
Pawel Burkhardt, Sars International Centre for Marine Molecular Biology, Norway  
Pawel Roszak, Sainsbury Laboratory, Cambridge, United Kingdom  
Pedro Campinho, IGBMC, France  
Pedro L. Herrera, University of Geneva Faculty of Medicine, Switzerland  
Peihua Jiang, Monell Chemical Senses Center, United States  
Peng Dai, Shanghai Institute for Biological Sciences, China  
Peng Xia, Institute of Science and Technology Austria, Austria



Peng Zhang, German Cancer Research Center (DKFZ)-, Germany  
Pengtao Liu, University of Hong Kong, Hong Kong  
Peter A Lawrence, University of Cambridge, United Kingdom  
Peter Currie, Australian Regenerative Medicine Institute, Australia  
Peter Dirks, The Hospital for Sick Children, Canada  
Peter Hohenstein, University of Edinburgh, United Kingdom  
Peter Nicholls, Whitehead institute, United States  
Peter Okkema, University of Illinois at Chicago, United States  
Peter Rugg-Gunn, Babraham Institute, United Kingdom  
Peter W Zandstra, University of Toronto, Canada  
Peter Zammit, King's College, United Kingdom  
Philip A. Seymour, Copenhagen University, Denmark  
Philip Benfey, Duke University, United States  
Philip William Ingham, Imperial College, London - Nanyang Technological University, Singapore  
Philipp Vick, Universitaet Hohenheim, Germany  
Phillip Grote, Goethe-Universität Frankfurt, Germany  
Pia Nyeng, Lund University, Sweden  
Pierre Cattenoz, IGBMC, France  
Pierre Leopold, Institut Curie Centre de Recherche, France  
Pierre Savatier, INSERM U1208, France  
Pierre Vanderhaeghen, Universite Libre de Bruxelles, Belgium  
Pierre-Francois Lenne, CNRS/ Aix-Marseille Université, France  
Pooja Teotia, Univ Nebraska Medical Center, United States  
Prashant Pandey, National research Council Canada, Canada  
Prashanth Ramachandran, Uppsala University, Sweden  
Prem Yadav, Harvard University, United States  
Pu Wang, University North Carolina at Chapel Hill, United States  
Purushothama Rao Tata, Duke, United States  
Qi Zhou, Chinese Academy of Sciences, China  
Qian Wang, Columbia University, United States  
Qiao Zhou, Harvard University, United States  
Qi-En Yang, Chinese Academy of Sciences, China  
Qing Nie, University of California, Irvine, United States  
Qing Zhong, Childrens Medical Research Institute, Australia  
Qingzhong Ren, Janelia Farm Research Campus/HHMI, United States  
Qifufu Ma, Dana-Farber Cancer Institute, United States  
Qiusha Guo, Washington University School of Medicine, United States  
Quin-Yuang Sun, Chinese Academy of Sciences, China  
Rachel Cox, Uniformed Services University, United States  
Rachel Hoang, Haverford College, United States  
Rachel Kjolby, University of California-Berkeley, United States  
Raj Awatramani, Northwestern University, United States  
Rajani George, Indiana University School of Medicine, United States  
Raju Datla, National research Council Canada, Canada  
Ralf H. Adams, Max-Planck-Institute for Molecular Biomedicine, Germany  
Ralph Marcucio, UCSF, United States  
Ramesh Pillai, University of Geneva, Switzerland  
Ramkumar Sambasivan, Institute for Stem Cell Biology and Regenerative Medicine, India  
Randall T Moon, University of Washington School of Medicine, United States  
Randee Young, University of California, United States  
Rannar Airik, University of Pittsburgh, United States  
Raphael Kopan, Cincinnati Children's hospital, United States  
Raphael Margueron, Institut Curie, France  
Raphael Voituriez, UPMC, France  
Ray Dunn, Institute of Medical Biology, Singapore  
Raymond Goldstein, University of Cambridge, United Kingdom  
Razqallah Hakem, Princess Margaret Cancer Centre, Canada  
Rebecca D Burdine, Princeton University, United States  
Rebecca J Oakey, King's College London, United Kingdom  
Rebecca Kim, University of California, San Francisco, United States

Rei Sekiguchi, National Institute of Dental and Craniofacial Research, United States  
Reinhard Koester, Technical University of Braunschweig, Germany  
Reinhard Schuh, MPI, Germany  
Rene Ketting, IMB, Germany  
Renze Heidstra, Utrecht University, Netherlands  
Ricardo Fuentes, University of Pennsylvania, United States  
Ricardo Mallarino, Princeton University, United States  
Richard Behringer, MD Anderson Cancer Center, United States  
Richard Fehon, University of Chicago, United States  
Richard H Gomer, Texas A&M University, United States  
Richard Harland, University of California-Berkeley, United States  
Richard I Dorsky, University of Utah, United States  
Richard J Poole, University College London, United Kingdom  
Richard MacKnight, University of Otago, New Zealand  
Richard Meehan, MRC Human Genetics Unit, United Kingdom  
Richard Mills, Murdoch Children's Research Institute, Australia  
Richard Morris, National Centre for Biological Sciences, India  
Richard Napier, University of Warwick, United Kingdom  
Richard P Harvey, Victor Chang Cardiac Research Institute, Australia  
Richard Roy, McGill University, Canada  
Richard S Smith, Max Planck Institute for Plant Breeding Research, Germany  
Richard Saffery, Murdoch Childrens Research Institute, Australia  
Richard Schultz, University of Pennsylvania, United States  
Richard Sherwood, Brigham and Women's Hospital, United States  
Rieko Ajima, National Institute of Genetics, Japan  
Rishikesh Bhalerao, SLU, Sweden  
Rita Ferreira, IGBMC, France  
Rita Perlingeiro, University of Minnesota, United States  
Rob Meijers, EMBL Hamburg, Germany  
Rob White, Univ of Cambridge, United Kingdom  
Robb Krumlauf, Stowers Institute, United States  
Robert Bone, University of Copenhagen, Denmark  
Robert Braun, The Jackson Laboratory, United States  
Robert Burgess, The Jackson Laboratory, United States  
Robert Cornell, University of Iowa Medical School, United States  
Robert D Burke, University of Victoria, Canada  
Robert F Hevner, University of Washington, United States  
Robert Feil, University of Montpellier, CNRS, France  
Robert G Kelly, Aix Marseille Universite UMR 7288 CNRS, France  
Robert Hill, University of Edinburgh, United Kingdom  
Robert Hindges, King's College London, United Kingdom  
Robert J Duronio, University of North Carolina, United States  
Robert Krauss, Mount Sinai Sch of Medicine, United States  
Robert Lipinski, University of Wisconsin, United States  
Robert Sablowski, John Innes Centre, United Kingdom  
Robert Tower, University of Pennsylvania, United States  
Roberto A Mayor, University College London, United Kingdom  
Roberto Bonasio, University of Pennsylvania, United States  
Roberto Bruzzone, HKU-Pasteur, France  
Robin J. M. Franklin, Cambridge Stem Cell Institute, United Kingdom  
Robin Hobbs, Monash University, Australia  
Robin R Ali, UCL institute of Ophthalmology, United Kingdom  
Rocio Sampayo, Lawrence Berkeley National Laboratory, United States  
Rodolfo Ghirlando, NIDDK, United States  
Rodrigo Fernandez-Gonzalez, University of Toronto, Canada  
Rodrigo M Young, UCL, United Kingdom  
Roeland Nusse, Stanford University, United States  
Roland Le Borgne, CNRS, France  
Rolf Bodmer, Sanford-Burnham Medical Res. Inst., United States  
Romain Levayer, Institut Pasteur, France

Roman J. Giger, University of Michigan, United States  
Roman Ulm, University of Geneva, Switzerland  
Ron Waclaw, Cincinnati Children's Hospital Medical Center, United States  
Ronald E Ellis, Rowan University SOM, United States  
Ronen Schweitzer, Shriners Hospital for Children, Portland, United States  
Rongbo Li, University of California, United States  
Rosa Miyares, Janelia Farm Research Campus/HHMI, United States  
Rosalind M John, Cardiff University, United Kingdom  
Rosangela (Ross) Sozzani, NCSU, United States  
Ross A. Poche, Baylor College of Medicine, United States  
Roy V Sillitoe, Baylor College of Medicine, United States  
Rudra Das, Weizmann Institute of Science, Israel  
Rui Dilao, University of Lisbon, Portugal  
Rui Yi, University of Colorado, Boulder, United States  
Rulang Jiang, Cincinnati Children's Hospital Medical Center, United States  
Ruta Ziukaite, National Institute Medical Research, United Kingdom  
Ruth Ashery-Padan, Tel Aviv University, Israel  
Ruth Diez del Corral, Champalimaud Centre for the Unknown, Portugal  
Ruth Lehmann, NYU School of Medicine and HHMI, United States  
Ruth Slack, University of Ottawa, Canada  
Ryan C Range, Auburn University, United States  
Ryan Delgado, UCSF, United States  
Ryo Yamamoto, University of Stanford, United States  
Ryoichiro Kageyama, Kyoto University, Japan  
Ryusuke Niwa, University of Tsukuba, Japan  
Sabine Fuhrmann, Vanderbilt University Medical Center, United States  
Sabine Zachgo, University of Osnabrueck, Germany  
Saikat Mukhopadhyay, UT Southwestern Medical Center, United States  
Salim Seyfried, Potsdam University, Germany  
Sally A Moody, George Washington University, United States  
Sally Camper, University of Michigan, United States  
Sally Horne-Badovinac, University of Chicago, United States  
Sally Lowell, University of Edinburgh, United Kingdom  
Sam Guoping Gu, Rutgers, the State University of New Jersey, United States  
Samantha A Brugmann, Cincinnati Children's Hospital Medical Center, United States  
Samantha A Morris, Washington University in St. Louis, United States  
Sandip De, NICHD, NIH, United States  
Sandra Blaess, Institute of Reconstructive Neurobiology, Germany  
Sandra Blanco, Center for Cooperative Research in Biosciences - CIC bioGUNE, Spain  
Sandrine LEBRETON, UPMC Univ Paris, France  
Sandro Banfi, Telethon Institute of Genetics and Medicine (TIGEM), Italy  
Saptarshi Biswas, Columbia University Medical Center, United States  
Sara Marques, NOVA Medical School, Universidade Nova de Lisboa, Portugal  
Sara Ricardo, Institut de Biologia Molecular de Barcelona, Spain  
Sarah Bray, University of Cambridge, United Kingdom  
Sarah De Val, University of Oxford, United Kingdom  
Sarah Hake, USDA, United States  
Sarah Herberg, IMP Vienna, Austria  
Sarah Knox, UCSF, United States  
Sarah Liljegren, University of North Carolina, United States  
Sarah McCarthy, Maine Medical Center Research Institute, United States  
Sarah Neuman, University of Wisconsin-Madison, United States  
Sarah Robinson, University of Bern, Switzerland  
Satheesha Velayudhan, Rowan University SOM, United States  
Satoshi Namekawa, Cincinnati Children's Hospital, United States  
Saulius Sumanas, Cincinnati Children's Hospital Medical Center, United States  
Saverio Bellusci, Justus-Liebig-University Giessen, Germany  
Savraj Grewal, University of Calgary, Canada  
Scott Boden, John Innes Centre, United Kingdom  
Scott D Weatherbee, Yale University, United States

Scott E Fraser, University of Southern California, United States  
Scott Holley, Yale University, United States  
Scott Kennedy, Harvard Medical School, United States  
Scott Nichols, University of Denver, United States  
Scott Rankin, Cincinnati Childrens Hospital, United States  
Sean G Megason, Harvard Medical School, United States  
Sean Lee, Johns Hopkins U. School of Medicine, United States  
Sebastian Ahnert, University of Cambridge, United Kingdom  
Sebastian Jessberger, University of Zurich, Switzerland  
Sebastian M Shimeld, University of Oxford, United Kingdom  
Sebastian Wissel, IMBA, Austria  
Sebastian Wolf, COS Heidelberg, Germany  
Seema Agarwala, University of Texas, Austin, United States  
Serge Nef, University of Geneva Medical School, Switzerland  
Sergei G Tevosian, University of Florida, United States  
Sergio Simoes, University of Toronto, Canada  
Seungil Ro, University of Nevada School of Medicine, United States  
Sevan Hopyan, The Hospital for Sick Children, Canada  
Shaad M Ahmad, Indiana State University, United States  
Shai Shaham, The Rockefeller University, United States  
Shankar Srinivas, University of Oxford, United Kingdom  
Shannon Fisher, Boston University, United States  
Sharon Amacher, The Ohio State University, United States  
Sharon Gerecht, Johns Hopkins University, United States  
Sharon Lee, University of California, Davis, United States  
Shau-Ping Lin, National Taiwan University, Taiwan  
Shawn Ahmed, University of North Carolina, United States  
Shawn M Burgess, NHGRI/NIH, United States  
Shelley R Hepworth, Carleton University, Canada  
Sheryl Scott, University of Utah School of Medicine, United States  
Shigenori Hirose, Baylor College of Medicine, United States  
Shigeo Hayashi, Riken Center for Developmental Biology, Japan  
Shigeru Kuratani, Center for Developmental Biology, RIKEN, Japan  
Shimako Kawachi, University of California, United States  
Shinsuke Ito, RIKEN-IMS, Japan  
Shinuo Weng, UT Austin, United States  
Shioko Kimura, National Cancer Institute, United States  
Sho Ota, National Institute on Deafness, United States  
Shosei Yoshida, National Institute for Basic Biology, Japan  
Shouka Parvin-Nejad, University of Toronto, Canada  
Shoukhrat Mitalipov, Oregon Health & Science University, United States  
Shunsuke Kuroki, Institute for Virus Research, Kyoto University, Japan  
Shunsuke Miyashima, Nara Institute of Science and Technology, Japan  
Siegfried Roth, University of Cologne, Germany  
Sigal Savaldi-Goldstein, Technion, Israel  
Sigolène Meilhac, Institut Imagine, Institut Pasteur, France  
Sila Konur Ultanir, National Institute for Medical Research, United Kingdom  
Silvia Cappello, Max Planck Institute of Psychiatry, Germany  
silvia santos, The Francis Crick Institute, United Kingdom  
Simon Bamforth, Newcastle University, United Kingdom  
Simon Kelley, The Hospital for Sick Children Toronto, Canada  
Simon M Hughes, King's College London, United Kingdom  
Simón Méndez-Ferrer, Cambridge Stem Cell Institute, United Kingdom  
Simon Sprecher, Université de Fribourg, Switzerland  
Simon Turner, The University of Manchester, United Kingdom  
Simona Lodato, Humanitas University, Italy  
Siobhan A Braybrook, University of California, Los Angeles, United States  
Sofia Otero, The Sainsbury Laboratory University of Cambridge, United Kingdom  
Songhai Shi, Sloan-Kettering Institute, United States  
Sonya Widen, University of Alberta, Canada

Soo-Kyung Lee, OHSU, United States  
Sophie Tritschler, Helmholtz Zentrum Munchen, Germany  
Sourabh Bhide, Universitat zu Koln, Germany  
Stacey K Ogden, St. Jude Children's Research Hospital, United States  
Stacey Rentschler, Washington University School of Medicine, United States  
Staffan Persson, University of Melbourne, Australia  
Stavros Thomopoulos, Columbia University, United States  
Stefan C Materna, UCSF, United States  
Stefan de Folter, CINVESTAV-IPN, Mexico  
Stefan Hans, TU Dresden, Germany  
Stefan Hoppler, University of Aberdeen, United Kingdom  
Stefan Legewie, IMB Institute of Molecular Biology gGmbH, Germany  
Stefan Schulte-Merker, WWU Münster, Germany  
Stefan Thor, Linköping University, Sweden  
Stefan Tümpel, Leibniz Institute on Aging - Fritz Lipmann Institute, Germany  
Stefano Biressi, Dulbecco Telethon Institute-University of Trento, Italy  
Stefano De Renzis, EMBL-Heidelberg, Germany  
Stefano Piccolo, University of Padua School of Medicine, Italy  
Stefano Schiaffino, Venetian Institute of Molecular Medicine, Italy  
Stephan Schneider, Iowa State University, United States  
Stephane Angers, U. of Toronto, Canada  
Stephane Roy, Universite de Montreal, Canada  
Stéphane Zaffran, Aix Marseille University, France  
Stephanie Griemsmann, Heinrich Heine University, Germany  
Stephen Frankenberg, University of Melbourne, Australia  
Stephen Frenk, University of North Carolina, United States  
Stephen Henri Devoto, Wesleyan University, United States  
Stephen Miller, University of Maryland Baltimore County, United States  
Stephen R Farmer, Boston University School of Medicine, United States  
Stephen Small, New York University, United States  
Stephen Wilson, University College London, United Kingdom  
Steve P Watson, Birmingham University, United Kingdom  
Steve Potter, Children's Hospital Medical Center, United States  
Steven Douglas Morley, The University of Edinburgh, United Kingdom  
Steven Maere, VIB-UGent Center for Plant Systems Biology, Belgium  
Steven McLoon, University of Minnesota, United States  
Steven Pollard, University of Edinburgh, United Kingdom  
Steven W. L'Hernault, Emory University, United States  
Stewart Gillmor, CINVESTAV-IPN, Mexico  
Stijn De Langhe, University of Alabama at Birmingham, United States  
Stijn P. De Langhe, University of Alabama at Birmingham, United States  
Stryder Meadows, Tulane University, United States  
Stuart Newfeld, Arizona State University, United States  
Su Sodmergen, Peking University, China  
Sudipto Roy, Institute of Molecular and Cell Biology, Singapore  
Sundar Naganathan, Francis Crick Institute/University College London, United Kingdom  
Susan Abmayr, Stowers Inst. for Med. Res., United States  
Susan Fisher, University of California, San Francisco, United States  
Susan Mackem, NCI, CCR, United States  
Susan Schwab, NYU School of Med, Skirball, United States  
Susanne Dietrich, Portsmouth University, United Kingdom  
Susumu Hirose, National Institute of Genetics, Japan  
Suya Wang, Childrens Hospital Boston, United States  
Sven Bogdan, Philipps-University Marburg, Germany  
Svetlana Gavrilov, Sloan-Kettering Institute, United States  
Swathi Arur, MD Anderson, United States  
Sylvie Schneider-Maunoury, Insitut de Biologie, Paris Seine, France  
Tadashi Uemura, Kyoto University, Japan  
Tai Montgomery, Colorado State University, United States  
Takashi Hiiragi, EMBL, Germany



Takashi Kondo, RIKEN-RCAI, Japan  
TAKASHI NISHIMURA, RIKEN Center for Developmental Biology, Japan  
Takato Imaizumi, University of Washington, United States  
Takehito Tomita, EMBL Heidelberg, Germany  
Takeo Onuma, Osaka University, Japan  
Takeshi Kawauchi, Keio University School of Medicine, Japan  
Takeshi Matsui, RIKEN center for Integrative Medical Sciences, Japan  
Taku Saito, The University of Tokyo, Japan  
Talila Volk, Weizmann Institute, Israel  
Tania Incitti, University of Minnesota, United States  
Tarik Haydar, Boston University, United States  
Taryn Sumabat, University of California, United States  
Tatiana Petrova, Centre Pluridisciplinaire d'oncologie, Switzerland  
Tatjana Piotrowski, Stowers Institute for Medical Research, United States  
Tatjana Sauka-Spengler, University of Oxford, United Kingdom  
Tatsumi Hirata, National Institute of Genetics, Japan  
Tatsuya Kobayashi, Massachusetts General Hospital, United States  
Teresa Rayon, The Francis Crick Institute, United Kingdom  
Terry P Yamaguchi, National Cancer Institute-Frederick, NIH, United States  
Tetsuhiro Kudoh, University of Exeter, United Kingdom  
Tetsuya Nakamura, Rutgers, The State University of New Jersey, United Kingdom  
Teva Vernoux, ENS Lyon, France  
Thierry JAFFREDO, CNRS, France  
Thijs van Boxtel, The Francis Crick Institute, United Kingdom  
Thomas Boettger, Max-Planck-Institut for Heart and Lung Research, Germany  
Thomas Brand, Imperial College London, United Kingdom  
Thomas Braun, Max-Planck-Institut for Heart and Lung Research, Germany  
Thomas F Schilling, University of California, Irvine, United States  
Thomas Greb, Heidelberg University, Germany  
Thomas Gregor, Princeton University, United States  
Thomas Gridley, Maine Medical Center Research Institute, United States  
Thomas J. Carroll, University of Texas Southwestern Medical Center, United States  
Thomas Lamonerie, Institut de Biologie Valrose, France  
Thomas Lecuit, CNRS-University of Marseille, France  
Thomas Liebenstein, University of Bayreuth, Germany  
Thomas Mindos, Fritz Lipmann Institute, Germany  
Thomas Pujol, CRG, Spain  
Thomas Schmulling, Free University of Berlin, Germany  
Thomas Theil, University of Edinburgh, United Kingdom  
Thomas Thumberger, Heidelberg University, Germany  
Thomas W Holstein, Heidelberg University, Germany  
Thomas W. Cline, University of California, Berkeley, United States  
Thorold W Theunissen, Washington University School of Medicine in St. Louis, United States  
Tianlu Ma, Johns Hopkins University, United States  
Tiffany Heanue, Francis Crick Institute, United Kingdom  
Tim Ott, Universitaet Hohenheim, Germany  
Tim Schedl, Washington University Sch of Med, United States  
Timothy E Kennedy, McGill University, Canada  
Timothy F Plageman, The Ohio State University, United States  
Timothy R Gershon, University of North Carolina at Chapel Hill, United States  
Timothy T Weil, University of Cambridge, United Kingdom  
Ting Xie, Stowers Institute, United States  
Todd Blankenship, University of Denver, United States  
Todd Evans, Weill Cornell Medical College, United States  
Todd Nystul, UCSF, United States  
Todd Starich, University of Minnesota, United States  
Tom Fleming, University of Southampton, United Kingdom  
Tom Millard, University of Manchester, United Kingdom  
Tom Vondriska, University of California, Los Angeles, United States  
Tomasz J Nowakowski, UCSF, United States

Tomoko Kaneko-Ishino, Tokai University, Japan  
Tomonari Hayama, Oregon Health & Science University, United States  
Tony DeFalco, Cincinnati Children's Hospital Medical Center, United States  
Tony Harris, University of Toronto, Canada  
Tony Marchand, Albert Einstein College of Medicine, United States  
Tony Rossi, New York University, United States  
Torsten Krude, University of Cambridge, United Kingdom  
Toshihiro Uesaka, Graduate School of Medicine, Kobe University, Japan  
Travis Kent, The Jackson Laboratory, United States  
Trista North, Beth Israel Deaconess Medical Center, United States  
Tristan Bouschet, Institut de Génomique Fonctionnelle, France  
Tristan Rodriguez, Imperial College London, United Kingdom  
Tully Michael Underhill, The University of British Columbia, Canada  
Tzumin Lee, Janelia Farm Research Campus/HHMI, United States  
Ulrich Rüter, Heinrich-Heine-University, Germany  
Ulrich Technau, University of Vienna, Austria  
Ulrich Tepass, University of Toronto, Canada  
Urs Fischer, Umeå Plant Science Centre, Sweden  
Urs Schmidt-Ott, University of Chicago, United States  
Ursula Goodenough, Washington University, United States  
Utpal Banerjee, Univ of California, United States  
Uwe Irion, Max Planck Institute, Germany  
Valentina Greco, Yale Medical School, United States  
Valérie Castellani, University of Lyon, University of Lyon1, France  
Valerie Gouon-Evans, Boston University School of Medicine, United States  
Valerie Kouskoff, University of Manchester, United Kingdom  
Valerie Reinke, Yale University School of Medicine, United States  
Valerie Wallace, Toronto Western Research Institute, Canada  
Valerie Wilson, University of Edinburgh, United Kingdom  
Vanessa Nieto Estevez, The University of Texas at San Antonio, United States  
Vassilis Pachnis, The Francis Crick Institute, United Kingdom  
Veit Riechmann, Heidelberg University, Medical Faculty Mannheim, Germany  
Venugopala G. Reddy, University Of California, Riverside, United States  
Veronica Hinman, Carnegie Mellon University, United States  
Veronica Moreno-Juan, Instituto de Neurociencias de Alicante, Spain  
Veronique Lefebvre, Children's Hospitals of Philadelphia, United States  
Victor Borrell, CSIC - Universidad Miguel Hernández, Spain  
Victor Hatini, Tufts University School of Medicine, United States  
Vidu Garg, Nationwide Children's, United States  
Viktor Zarsky, Institute of Experimental Botany, Czech Republic  
Vil Fernandes, New York University, United States  
Vincent Cunliffe, University of Sheffield, United Kingdom  
Vincent Galy, IBPS, UMR7622-CNRS-UPMC, France  
Vincent Mirouse, GReD laboratory, CNRS UMR6293, INSERM U1103, France  
Viola Willemsen, WUR, Netherlands  
Virginia E Papaioannou, Columbia University Medical Center, United States  
Virginie Lecaudey, University of Frankfurt, Germany  
Volker Hartenstein, UCLA, United States  
Wado Akamatsu, Keio University, School of Medicine, Japan  
Wayne Forrester, Indiana University, United States  
Wei Dai, University of California, United States  
Wei Li, Eye Institute, Xiamen University, China  
Wei Ling Chang, University of Southern California, United States  
Wei Yan, University of Nevada, Reno, United States  
Weichun Lin, UT Southwestern Medical Center, United States  
Weilan Ye, Genentech Inc., United States  
Wellington V Cardoso, Columbia University Medical Center, United States  
Wendy Dean, The Babraham Institute, United Kingdom  
Wenjun Guo, Albert Einstein College of Medicine, United States  
Wes Grueber, Columbia University, United States

William G Wadsworth, Rutgers Robert Wood Johnson Medical School, United States  
William Harris, Cambridge University, United Kingdom  
William Klein, Columbia University, United States  
William Pu, Childrens Hospital Boston, United States  
William Sullivan, University of California, United States  
William Talbot, Stanford University, United States  
Wilson K Clements, St Jude Children's Research Hospital, United States  
Wolfgang Lukowitz, University of Georgia, United States  
Wolfgang Schmidt, Academia Sinica, Taiwan  
Wolfram Goessling, Harvard Stem Cell Institute, United States  
Xavier Belles, Institute of Evolutionary Biology (CSIC-UPF), Spain  
Xavier Morin, Institute of Developmental Biology of Marseille, France  
Xianghu Qu, Vanderbilt University Medical Center, United States  
Xiaochun Bai, Southern Medical University, China, China  
Xiaohui Lyu, Sloan-Kettering Institute, United States  
Xin Chen, Johns Hopkins University, United States  
Xin Lou, Nanjing University, China  
Xin Sun, University of California, United States  
Xin Zhang, Columbia University, United States  
Xin-Yun Huang, Cornell University, United States  
Xiuchun Cindy Tian, University of Connecticut, United States  
Yacine Graba, CNRS-University of Marseille, France  
Yanhai Yin, Iowa state, USA, United States  
Yannick Schwab, EMBL, Germany  
Yewei Xing, University of Michigan, United States  
Yi Ariel Zeng, Shanghai Institute of Biochemistry and Cell Biology, Chinese Academy of Sciences, China  
Yi Li, Baylor College of Medicine, United States  
Yi-Hsien Su, Academia Sinica, Taiwan  
Yingyu Mao, Columbia University, United States  
Yingzi Yang, Harvard University, United States  
Yi-Quan Wang, Xiamen University, China  
Yka E Helariutta, University of Cambridge, United Kingdom  
Yohanns Bellaiche, Institut CURIE, France  
Yoh-suke Mukoyama, National Heart, Lung, and Blood Institute, United States  
Yoichi Shinkai, RIKEN, Japan  
Yoji Kojima, Graduate School of Medicine, Kyoto University, Japan  
Yoram Groner, The Weizmann Institute of Science, Israel  
Yoshiaki Kubota, Keio University School of Medicine, Japan  
Yoshinobu Ichimura, Niigata University, Japan  
Yoshinobu Nakanishi, Kanazawa University, Japan  
Yoshinori Makino, The University of Tokyo, Japan  
Youssef Belkhadir, Gregor Mendel Institute, Austria  
Yousuke Takahama, University of Tokushima, Japan  
Yu Leng Phua, University of Pittsburgh, United States  
Yue Xiong, University North Carolina at Chapel Hill, United States  
Yuhkoh Satouh, Osaka University, Japan  
Yuhkouch Satouh, Osaka University, Japan  
Yuji Watanabe, Fukushima Medical University, Japan  
Yuki Kondo, University of Tokyo, Japan  
Yuki Okada, The University of Tokyo, Japan  
Yukiko Gotoh, University of Tokyo, Japan  
Yukiko M Yamashita, University of Michigan, Ann Arbor, United States  
Yukio Saijoh, University of Utah, United States  
Yuling Jiao, Institute of Genetics and Developmental Biology, CAS, China  
Yumiko Saga, National Institute of Genetics, Japan  
Yutaka Kikuchi, Hiroshima University, Japan  
Yutaka Matsubayashi, King's College London, United Kingdom  
Yuval Eshed, Weizmann Institute of Science, Israel  
Yuxuan Guo, Childrens Hospital Boston, United States

Yuya Ogawa, Cincinnati Childrens' Hospital, United States  
Yvan Arsenijevic, Université de Lausanne, Switzerland  
Zachary Nimchuk, UNC Chapel Hill, United States  
Zaida Vergara, Centro de Biología Molecular Severo Ochoa, Spain  
Zhanguo Gao, University of Texas Health Science Center at Houston , United States  
Zhiguo Ma, Vollum Institute, United States  
Zhi-Yong Wang, Carnegie Institution for Science, United States  
Zhonghui Zhang, South China Normal University, China  
Zhongya Song, Stony Brook University, United States  
Zila Luz Paulino Simoes, University of Sao Paulo, Brazil  
Zissimos Mourelatos, University of Pennsylvania, United States  
Zoltan M Varga, University of Oregon, United States  
Zoltan Molnar, University of Oxford, United Kingdom  
Zuping He, Hunan Normal University, China
